# Supplementary material
Source: Royal Society of Chemistry journal article supplement (doi:10.1039/d6fo00601a)
Supplement: d6fo00601a1.xlsx [file d6fo00601a1.xlsx]

## Sheet: Supplementary_Table_1
Supplementary Table 1: Phenolic profile (µmol 100 g⁻¹) of barley flours and extruded products.
	Flours					Extruded products
	Annapurna®	Hilose®	DHL-151340	SBExpCE		Annapurna®	Hilose®	DHL-151340	SBExpCE
Catechin	25.15 ± 0.31 a	19.84 ± 0.3 b	5.58 ± 0.3 d	15.73 ± 1.74 c		18.38 ± 1.08 c	32.75 ± 1.63 a	6.87 ± 0.2 d	23.33 ± 1.48 b
Epicatechin	n.d.	n.d.	n.d.	n.d.		n.d.	14.51 ± 0.83 a	n.d.	11.8 ± 0.67 b
Catechin-glucoside	57.36 ± 6.16 a	68.18 ± 0.79 a	21.39 ± 0.71 b	30.08 ± 1.83 b		13.46 ± 0.37 a	8.65 ± 1.51 ab	10.06 ± 0.16 ab	6.38 ± 0.47 b
Procyanidin B3	69.57 ± 0.8 b	74.41 ± 1.77 a	23.71 ± 0.51 d	31.27 ± 0.32 c		17.69 ± 0.57 a	11.67 ± 0.18 b	10.32 ± 0.47 b	n.d.
Procyanidin B2	2.24 ± 0.24 a	n.d.	n.d.	n.d.		1.645 ± 0.355 a	n.d.	n.d.	n.d.
Gallocatechin-Catechin/Prodelphinidin B4	76.91 ± 3.94 a	83.76 ± 0.18 a	20.81 ± 1.98 b	24.39 ± 0.76 b		14.75 ± 0.42 a	6.70 ± 0.12 c	8.89 ± 0.13 b	n.d.
Gallocatechin-Catechin/Prodelphinidin B3	2.7 ± 0.69 a	n.d.	n.d.	n.d.		1.98 ± 0.74 a	n.d.	n.d.	n.d.
Procyanidin-diglucoside	1.13 ± 0.08 b	1.99 ± 0.17 a	n.d.	1.41 ± 0.04 b		0.485 ± 0.005 c	1.47 ± 0.08 a	n.d.	1.19 ± 0.02 b
Procyanidin C2	n.d.	0.85 ± 0.2 a	n.d.	n.d.		n.d.	n.d.	n.d.	n.d.
Total Flavan-3-ols	235.07 ± 9.98 a	249.02 ± 0.12 a	71.5 ± 2.9 c	102.89 ± 1.13 b		68.38 ± 2.69 a	75.735 ± 2.17 a	36.14 ± 0.71 b	42.69 ± 2.63 b
Apigenin-6-C-arabinoside-8-C-glucoside	0.26 ± 0.01 b	0.32 ± 0.05 b	0.7 ± 0.05 a	0.54 ± 0.01 a		0.07 ± 0 b	0.100 ± 0 b	0.18 ± 0.02 a	0.08 ± 0.01 b
Isoorientin	n.d.	0.16 ± 0.02 a	n.d.	n.d.		n.d.	n.d.	n.d.	n.d.
Isovitexin-7-O-Glucoside	0.1 ± 0.01 b	0.16 ± 0.03 b	0.79 ± 0.11 a	0.11 ± 0.01 b		n.d.	0.135 ± 0.02 b	0.46 ± 0.05 a	n.d.
Isoscoparin-7-O-Glucoside	0.95 ± 0.09 b	1.63 ± 0.02 a	0.9 ± 0.07 b	0.95 ± 0.02 b		0.38 ± 0.05 b	0.775 ± 0.045 a	0.57 ± 0.06 ab	0.48 ± 0.05 ab
Isovitexin-7-O-Rutinoside	0.2 ± 0.04 a	0.11 ± 0 ab	0.11 ± 0.01 ab	n.d.		0.115 ± 0.005 a	n.d.	0.1 ± 0.01 a	0.06 ± 0.002 b
Isoorientin-7-O-Rutinoside	0.09 ± 0 a	n.d.	n.d.	n.d.		n.d.	n.d.	n.d.	n.d.
Isoscoparin-7-O-Rutinoside	0.32 ± 0.06 a	0.11 ± 0.02 ab	0.1 ± 0.02 ab	n.d.		0.14 ± 0.01 a	n.d.	0.12 ± 0.01 b	n.d.
Isovitexin-7-(6-feruloyl)-glucoside-4-O-Glucoside	n.d.	0.05 ± 0.01 a	n.d.	n.d.		n.d.	n.d.	n.d.	n.d.
Luteolin	n.d.	n.d.	12.28 ± 1.3 a	0.19 ± 0.03 b		n.d.	n.d.	8.39 ± 0.13 a	n.d.
Methyl luteolin (chrysoeriol)	0.19 ± 0.02 b	3.61 ± 0.05 b	49.35 ± 2.73 a	1.97 ± 0.01 b		0.07 ± 0.01 b	1.6 ± 0.5 b	37.02 ± 0.77 a	0.50 ± 0.02 b
Luteolin-O-Glucoside	n.d.	1.47 ± 0.03 a	0.47 ± 0.05 b	n.d.		n.d.	0.36 ± 0.01 b	0.47 ± 0.03 a	n.d.
Luteolin-7-O-Glucuronide	0.03 ± 0 b	n.d.	17.05 ± 3.15 a	0.42 ± 0.04 b		0.03 ± 0 b	n.d.	23.43 ± 0.28 a	0.04 ± 0 b
Methyl luteolin-O-Glucoside	n.d.	n.d.	0.17 ± 0 a	n.d.		n.d.	n.d.	0.13 ± 0.01 a	n.d.
Methyl luteolin-O-Glucuronide	0.47 ± 0.03 b	1.53 ± 0.4 b	205.52 ± 0.87 a	2.35 ± 0.17 b		0.15 ± 0.04 b	0.5 ± 0.02 b	174.56 ± 6.51 a	0.17 ± 0.02 b
Total Free Flavones	2.6 ± 0.1 b	9.13 ± 0.3 b	287.44 ± 3.84 a	6.53 ± 0.25 b		0.95 ± 0.02 b	3.47 ± 0.46 b	245.41 ± 7.21 a	1.31 ± 0.02 b
B_Apigenin-6-C-Arabinoside-8-C-Glucoside	n.d.	0.06 ± 0.01 b	0.08 ± 0.01 ab	0.1 ± 0.01 a		n.d.	0.08 ± 0 b	0.29 ± 0.02 a	0.11 ± 0.01 b
B_Apigenin-O-Glucoside	n.d.	n.d.	n.d.	0.06 ± 0 a		n.d.	n.d.	n.d.	0.09 ± 0.01 a
B_Isovitexin-7-O-Glucoside	n.d.	n.d.	0.05 ± 0 a	0.02 ± 0 b		n.d.	0.16 ± 0 b	0.44 ± 0.01 a	0.07 ± 0 c
B_Isoscoparin-7-O-Glucoside	0.22 ± 0.02 a	0.21 ± 0 a	0.09 ± 0.01 b	0.08 ± 0 b		0.665 ± 0.005 c	1.015 ± 0.035 a	0.79 ± 0.02 b	0.59 ± 0.02 c
B_Isovitexin-7-O-Rutinoside	n.d.	0.02 ± ab	0.03 ± 0.01 a	0.02 ± 0 ab		n.d.	0.04 ± 0 c	0.12 ± 0 a	0.08 ± 0.01 b
B_Isoscoparin-7-O-Rutinoside	n.d.	n.d.	0.01 ± 0 a	n.d.		n.d.	0.04 ± 0 b	0.09 ± 0.01 a	0.02 ± 0.01 bc
B_Luteolin	n.d.	n.d.	0.12 ± 0.01 a	n.d.		n.d.	n.d.	0.12 ± 0.01 a	n.d.
B_Methyl luteolin (chrysoeriol)	0.02 ± 0 b	0.03 ± 0 b	0.26 ± 0.01 a	0.02 ± 0 b		0.02 ± 0 b	0.03 ± 0 b	1.18 ± 0.10 a	0.01 ± 0 b
B_Luteolin-O-Glucoside	n.d.	n.d.	0.08 ± 0.01 a	n.d.		n.d.	n.d.	n.d.	n.d.
B_Luteolin-7-O-Glucuronide	n.d.	0.01 ± 0 b	0.52 ± 0.1 a	n.d.		n.d.	n.d.	3.25 ± 0.12 a	n.d.
B_Methyl luteolin-O-Glucoside	n.d.	n.d.	0.01 ± 0 a	n.d.		n.d.	n.d.	n.d.	n.d.
B_Methyl luteolin-O-Glucuronide	0.02 ± 0 b	0.06 ± 0.01 b	5.4 ± 0.53 a	0.07 ± 0.01 b		0.02 ± 0 b	0.1 ± 0 b	45.53 ± 0.68 a	n.d.
Total Bound Flavones	0.26 ± 0.02 b	0.39 ± 0 b	6.65 ± 0.42 a	0.38 ± 0.03 b		0.705 ± 0.005 b	1.47 ± 0.03 b	52.06 ± 0.66 a	0.97 ± 0 b
Pelargonidin-O-Glucoside	n.d.	n.d.	0.4 ± 0.05	n.d.		n.d.	n.d.	0.29 ± 0.01	n.d.
Cyanidin-3-O-Glucoside	n.d.	n.d.	9.92 ± 0.12	n.d.		n.d.	n.d.	5.78 ± 0.25	n.d.
Peonidin-3-O-Glucoside	n.d.	n.d.	0.62 ± 0.05	n.d.		n.d.	n.d.	0.34 ± 0.51	n.d.
Delphinidin-O-Glucoside	n.d.	n.d.	0.25 ± 0.03	n.d.		n.d.	n.d.	0.26 ± 0.07	n.d.
Cyanidin-O-Acetylglucoside	n.d.	n.d.	0.44 ± 0.023	n.d.		n.d.	n.d.	7.59 ± 1.20	n.d.
Peonidin-O-Acetylglucoside	n.d.	n.d.	n.d.	n.d.		n.d.	n.d.	0.46 ± 0.01	n.d.
Delphinidin-O-Acetylglucoside	n.d.	n.d.	n.d.	n.d.		n.d.	n.d.	0.19 ± 0.03	n.d.
Pelargonidin-O-Malonylglucoside	n.d.	n.d.	1.81 ± 0.07	n.d.		n.d.	n.d.	0.72 ± 0.12
Cyanidin-O-Malonylglucoside	n.d.	n.d.	21.18 ± 2	n.d.		n.d.	n.d.	4.29 ± 0.55	n.d.
Peonidin-O-Malonylglucoside	n.d.	n.d.	2.53 ± 0.1	n.d.		n.d.	n.d.	0.53 ± 0.09	n.d.
Delphinidin-O-Malonylglucoside	n.d.	n.d.	0.92 ± 0.09	n.d.		n.d.	n.d.	0.20 ± 0.02	n.d.
Pelargonidin-O-Dimalonylglucoside	n.d.	n.d.	1.19 ± 0.04	n.d.		n.d.	n.d.	0.10 ± 0.01	n.d.
Cyanidin-O-Dimalonylglucoside	n.d.	n.d.	5.09 ± 0	n.d.		n.d.	n.d.	1.74 ± 0.27	n.d.
Peonidin-O-Dimalonylglucoside	n.d.	n.d.	0.07 ± 0	n.d.		n.d.	n.d.	0.04 ± 0.00	n.d.
Total Anthocyanins	n.d.	n.d.	44.43 ± 2.71	n.d.		n.d.	n.d.	22.83 ± 2.55	n.d.
4-Hydroxybenzoic acid	1.21 ± 0.02 c	1.24 ± 0.11 c	1.63 ± 0.09 b	2.66 ± 0.02 a		0.924 ± 0.13 c	1.25 ± 0.15 c	2.07 ± 0.09 b	2.71 ± 0.12 a
3,4-Dihydroxybenzoic acid	n.d.	n.d.	6.04 ± 0.6 a	n.d.		n.d.	n.d.	8.915 ± 0.16 a	n.d.
4'-Hydroxycinnamic acid (cis/trans)	1.28 ± 0.15 b	n.d.	n.d.	2.27 ± 0.02 a		n.d.	n.d.	n.d.	1.81 ± 0.14 a
4-Hydroxy-3-methoxybenzoic acid	3.44 ± 0.07 a	2.84 ± 0.07 b	2.5 ± 0.08 c	n.d.		3.69 ± 0.04 a	3.175 ± 0.22 ab	2.91 ± 0.15 b	n.d.
3-Hydroxy-4-methoxybenzoic acid	n.d.	n.d.	n.d.	1.94 ± 0.2 a		n.d.	n.d.	n.d.	2.98 ± 0.05 a
4'-Hydroxy-3'-methoxycinnamic acid (cis/trans)	2.59 ± 0.18 a	2.47 ± 0.05 a	3.26 ± 0.25 a	1.10 ± 0.09 b		2.09 ± 0.27 b	2.6 ± 0.13 b	4.325 ± 0.19 a	2.69 ± 0.12 b
3'-Hydroxy-4'-methoxycinnamic acid (cis/trans)	4.22 ± 0.07 a	1.54 ± 0.18 b	1.4 ± 0.14 b	1.22 ± 0.09 b		2.56 ± 0.08 a	2.97 ± 0.25 a	1.715 ± 0.01 a	2.16 ± 0.37 a
3,5-Dimethoxy-4-hydroxybenzoic acid						n.d.	n.d.	n.d.	0.93 ± 0.02 a
Syringaldehyde	0.77 ± 0.07 a	n.d.	n.d.	n.d.		0.48 ± 0.02 a	n.d.	n.d.	n.d.
Total Free phenolic acids	13.51 ± 0.14 a	8.09 ± 0.2 b	14.82 ± 0.72 a	9.19 ± 0.2 b		9.73 ± 0.44 c	10 ± 0.31 c	19.93 ± 0.25 a	13.26 ± 0.78 b
B_4-Hydroxybenzoic acid	2.66 ± 0.07 d	3.8 ± 0.03 b	6.92 ± 0.2 a	3.24 ± 0.01 c		4.87 ± 0.21 b	4.345 ± 0.375 b	8.89 ± 0.26 a	5.81 ± 0.29 b
B_Hydroxybenzoic acid	n.d.	1.43 ± 0.03 b	1.23 ± 0.04 c	1.72 ± 0.07 a		n.d.	2.07 ± 0.19 a	1.46 ± 0.04 b	1.55 ± 0.04 b
B_3,4-Dihydroxybenzoic acid	n.d.	n.d.	4.63 ± 0.03 a	n.d.		n.d.	n.d.	6.61 ± 0.26 a	n.d.
B_4'-Hydroxycinnamic acid (cis/trans)	39.4 ± 1.02 a	50.76 ± 1.54 a	28.33 ± 0.29 a	62.26 ± 10.62 a		46.70 ± 1.93 b	37.68 ± 2.61 c	22.49 ± 1.48 d	87.26 ± 1.51 a
B_3'-Hydroxycinnamic acid (cis/trans)	14.88 ± 0.47 a	19.93 ± 1.16 a	12.67 ± 2.52 a	31.09 ± 4.72 a		15.85 ± 0.50 b	12.09 ± 1.27 c	6.80 ± 0.41 d	20.98 ± 0.02 a
B_4-Hydroxy-3-methoxybenzoic acid	4.44 ± 0.11 b	6.35 ± 0.09 b	10.1 ± 0.68 a	5.85 ± 0.48 b		5.89 ± 0.29 d	7.28 ± 0.19 c	13.22 ± 0.10 a	8.80 ± 0.09 b
B_3',4'-Dihydroxycinnamic acid	0.48 ± 0.03 ab	0.98 ± 0.03 a	0.75 ± 0.14 ab	0.45 ± 0.05 b		0.68 ± 0.02 c	1.27 ± 0.01 b	1.47 ± 0.055 a	0.72 ± 0.05 c
B_4'-Hydroxy-3'-methoxycinnamic acid (cis/trans)	458.88 ± 6.98 b	552.5 ± 5.79 a	470.01 ± 0.5 b	384.79 ± 24.22 c		428.60 ± 23.84 a	424.51 ± 2.38 a	440.60 ± 0.70 a	440.44 ± 10.55 a
B_3'-Hydroxy-4'-methoxycinnamic acid (cis/trans)	212.28 ± 28.77 a	295.17 ± 3.57 a	231.96 ± 18.14 a	308.37 ± 5.69 a		181.41 ± 8.91 a	173.51 ± 5.83 a	156.61 ± 0.58 ab	125.03 ± 1.04 b
B_3,5-Dimethoxy-4-hydroxybenzoic acid	0.8 ± 0.01 a	0.88 ± 0.1 a	1.06 ± 0.08 a	1.06 ± 0.15 a		1.43 ± 0.05 a	0.985 ± 0.035 b	1.52 ± 0.11 a	1.59 ± 0.01 a
B_3,5-Dimethoxy-4-hydroxycinnamic acid	n.d.	18.84 ± 2.79 a	26.87 ± 3.61 a	n.d.		n.d.	33.46 ± 2.88 ab	40.8 ± 0.39 a	21.59 ± 5.77 b
B_4'-Hydroxy-3'-methoxycinnamic acid-O-pentoside	0.21 ± 0 b	0.46 ± 0.01 a	0.68 ± 0.04 a	0.48 ± 0.02 a		0.23 ± 0.01 b	0.395 ± 0.01 b	0.48 ± 0.03 a	0.57 ± 0 a
B_3',4'-Dihydroxycinnamic acid-O-hexoside	n.d.	0.14 ± 0.03 a	0.08 ± 0.01 a	n.d.		n.d.	0.235 ± 0.04 a	0.27 ± 0.03 a	0.18 ± 0.04 ab
B_3,5-Dimethoxy-4-hydroxycinnamic acid-O-hexoside	n.d.	24.15 ± 1.24 a	23.37 ± 1.07 a	11.29 ± 0.47 b		n.d.	42.84 ± 5.73 a	21.97 ± 1.57 b	16.85 ± 2.93 c
B_8/5-5'-Diferulic acid	30.39 ± 1.34 d	67.89 ± 2.06 b	74.64 ± 3.81 a	50.3 ± 1.63 c		25.61 ± 0.67 c	37.96 ± 0.37 b	46.70 ± 1.95 a	39.44 ± 1.98 b
B_TriFerulic acid	1.44 ± 0.04 b	2.28 ± 0.07 a	2.7 ± 0.32 a	1.69 ± 0.03 b		1.375 ± 0.05 a	0.665 ± 0.04 c	2.135 ± 0.14 a	0.84 ± 0.04 c
B_Cinnamic acid	n.d.	0.33 ± 0.01 b	1.96 ± 0.12 a	0.21 ± 0.02 b		n.d.	0.385 ± 0.02 b	1.72 ± 0.03 a	0.33 ± 0.05 b
B_Syringaldehyde (II)	1.23 ± 0.05 ab	0.95 ± 0.05 b	1.66 ± 0.08 a	1.43 ± 0.16 a		1.02 ± 0.01 a	n.d.	1.77 ± 0.03 c	1.29 ± 0.03 b
B_Diferulic acid decarboxylated form	15.34 ± 0.25 b	31.16 ± 0.75 a	35.06 ± 1.36 a	30.16 ± 1.03 a		8 ± 0 bc	10.07 ± 0.11 b	19.40 ± 0.89 a	7.39 ± 0.21 c
B_Diferulic acid reduced decarboxylated form	0.14 ± 0.01 a	n.d.	n.d.	n.d.		0.145 ± 0.01 a	n.d.	n.d.	n.d.
Total Bound phenolic acids	782.58 ± 34.01 b	1077.97 ± 11.63 a	934.69 ± 33.09 ab	894.41 ± 41.19 ab		721.78 ± 29.48 a	790.44 ± 3.49 a	797.87 ± 0.79 a	780.60 ± 18.58 a
Values are expressed as mean ± SD. For each compound, statistical differences among genotypes were evaluated separately for flours and extruded products using one-way ANOVA followed by Tukey’s HSD post hoc test (p < 0.05). Different lowercase letters within each group indicate significant differences. Compounds with the prefix B- correspond to phenolic compounds from the bound fraction. n.d., not…

## Sheet: Supplementary Table 2.
Supplementary Table 2. Phenolic profile (µmol 100 g⁻¹ extrudate, dry weight basis) in the bioaccessible and non-bioaccessible fractions of extruded barley samples after in vitro gastrointestinal digestion.
	Annapurna®		Hilose®		DHL-151340		SBExpCE
	Bioaccessible fraction	Non-bioaccessible fraction	Bioaccessible fraction	Non-bioaccessible fraction	Bioaccessible fraction	Non-bioaccessible fraction	Bioaccessible fraction	Non-bioaccessible fraction
Catechin	8.16 ± 0.39 c	7.86 ± 0.85 c	13.84 ± 0.49 ab	12.77 ± 1.32 b	5.27 ± 0.07 cd	2.44 ± 0.27 d	17.5 ± 0.16 a	7.59 ± 0.88 c
Epicatechin	n.d.	n.d.	5.51 ± 0.03 a	4.71 ± 0.07 ab	n.d.	n.d.	5.67 ± 0.66 a	3.26 ± 0.36 b
Catechin-O-Glucoside	4.72 ± 1.11 cd	4.45 ± 0.15 cd	9.44 ± 0.09 a	8.29 ± 0.16 ab	6.56 ± 0.02 bc	3.02 ± 0.08 de	6.03 ± 0.37 bc	1.75 ± 0.02 e
Procyanidin B3	4.96 ± 0.23 c	7.54 ± 0.95 ab	6.31 ± 0.28 bc	8.85 ± 0.46 a	7.77 ± 0.46 ab	4.43 ± 0.07 c	1.98 ± 0.06 d	1.24 ± 0.05 d
Procyanidin B2	n.d.	n.d.	n.d.	1.40 ± 0.10	n.d.	n.d.	n.d.	n.d.
Gallocatechin-Catechin/Prodelphinidin B4	3.59 ± 0.17 ab	1.8 ± 0.03 c	1.93 ± 0.15 c	3.07 ± 0.24 b	4.06 ± 0.04 a	1.55 ± 0.1 c	n.d.	n.d.
Procyanidin-O-diglucoside	0.82 ± 0.08 b	n.d.	1.05 ± 0.09 b	0.87 ± 0.12 b	n.d.	n.d.	1.67 ± 0.04 a	0.37 ± 0.05 c
Total Flavan-3-ols	22.26 ± 0.7 c	21.66 ± 1.98 c	38.08 ± 0.06 ab	39.97 ± 2.47 a	23.66 ± 0.6 c	11.44 ± 0.52 d	32.86 ± 0.24 b	14.21 ± 0.43 d
Apigenin-6-C-arabinoside-8-C-glucoside	0.08 ± 0 bc	0.03 ± 0 d	0.09 ± 0.01 b	0.04 ± 0.00 cd	0.3 ± 0.01 a	0.1 ± 0.00 b	0.13 ± 0.02 b	0.03 ± 0.00 d
Isovitexin-7-O-Glucoside	n.d.	n.d.	0.06 ± 0.01 cd	0.05 ± 0.00 cd	0.43 ± 0.01 a	0.2 ± 0.02 b	0.1 ± 0.01 c	0.03 ± 0.00 d
Isoscoparin-7-O-Glucoside	0.3 ± 0.05 bc	0.2 ± 0.01 c	0.89 ± 0.14 a	0.39 ± 0.00 bc	0.59 ± 0.01 ab	0.25 ± 0.00c	0.42 ± 0.08 bc	0.18 ± 0.02 c
Isovitexin-7-O-rutinoside	0.09 ± 0.01 a	0.02 ± 0.00 c	n.d.	n.d.	0.08 ± 0.01 ab	0.04 ± 0.00 bc	0.04 ± 0.00 c	0.02 ± 0.00 c
Isoscoparin-7-O-rutinoside	0.1 ± 0.01 a	0.09 ± 0.02 a	n.d.	n.d.	0.1 ± 0.01 a	0.04 ± 0.01 a	n.d.	n.d.
Luteolin	n.d.	n.d.	n.d.	n.d.	2.8 ± 0.23 b	10.72 ± 1.36 a	n.d.	n.d.
Methyl luteolin (chrysoeriol)	0.08 ± 0 c	0.15 ± 0 c	0.23 ± 0.01 c	0.67 ± 0.07 c	13.25 ± 0.89 b	35.34 ± 0.42 a	0.14 ± 0.02 c	0.24 ± 0.01 c
Luteolin-O-glucoside	n.d.	n.d.	n.d.	n.d.	0.46 ± 0.08 a	0.48 ± 0.04 a	n.d.	n.d.
Luteolin-7-O-Glucuronide	0.01 ± 0 c	0.01 ± 0 c	0.03 ± 0.01 c	0.01 ± 0.00 c	19.72 ± 0.38 a	12.8 ± 0.49 b	n.d.	0.01 ± 0.00 c
Methyl luteolin-O-Glucoside	n.d.	n.d.	n.d.	n.d.	0.06 ± 0.00 a	0.07 ± 0.01 a	n.d.	n.d.
Methyl luteolin-O-Glucuronide	0.07 ± 0.01 c	0.07 ± 0.01 c	0.17 ± 0 c	0.27 ± 0.03 c	86.76 ± 5.17 a	56.55 ± 1.39 b	0.03 ± 0.00 c	0.02 ± 0.00 c
Total Free Flavones	0.74 ± 0.04 b	0.56 ± 0.04 b	1.47 ± 0.14 b	1.42 ± 0.1 b	124.55 ± 5.99 a	116.59 ± 3.63 a	0.85 ± 0.05 b	0.52 ± 0.01 b
B_Apigenin-6-C-Arabinoside-8-C-Glucoside	n.d.	n.d.	n.d.	n.d.	n.d.	0.01 ± 0.00	n.d.	n.d.
B_Apigenin-O-Glucoside	n.d.	n.d.	n.d.	n.d.	n.d.	n.d.	n.d.	0.03 ± 0.00
B_Isovitexin-7-O-Glucoside	n.d.	n.d.	n.d.	0.01 ± 00.0 b	n.d.	0.04 ± 0.00 a	n.d.	0.01 ± 0.00 b
B_Isoscoparin-7-O-Glucoside	n.d.	0.19 ± 0.01 a	0.01 ± 0.00 d	0.09 ± 0.00 b	0.01 ± 0.00 d	0.06 ± 0.00 c	n.d.	0.05 ± 0.00 c
B_Isovitexin-7-O-Rutinoside	n.d.	n.d.	n.d.	n.d.	n.d.	0.01 ± 0.00	n.d.	n.d.
B_Isoscoparin-7-O-Rutinoside	n.d.	n.d.	n.d.	n.d.	n.d.	n.d.	n.d.	n.d.
B_Luteolin	n.d.	n.d.	n.d.	n.d.	0.02 ± 0.00 a	0.05 ± 0.01 a	n.d.	n.d.
B_Methyl luteolin (chrysoeriol)	n.d.	n.d.	n.d.	n.d.	0.08 ± 0.00 b	0.63 ± 0.05 a	n.d.	0.01 ± 0.00 c
B_Luteolin-O-Glucoside	n.d.	n.d.	n.d.	n.d.	n.d.	0.05 ± 0.00 a	n.d.	0.02 ± 0.00 b
B_Luteolin-7-O-Glucuronide	n.d.	n.d.	n.d.	n.d.	0.01 ± 0.00 b	0.26 ± 0.01 a	n.d.	n.d.
B_Methyl luteolin-O-Glucoside	n.d.	n.d.	n.d.	n.d.	n.d.	0.01 ± 0.00	n.d.	n.d.
B_Methyl luteolin-O-Glucuronide	n.d.	n.d.	0.01 ± 0.00 c	0.03 ± 0.00 c	0.64 ± 0.02 b	3.41 ± 0.07 a	n.d.	n.d.
Total Bound Flavones	n.d.	0.2 ± 0.01 c	0.02 ± 0.00 c	0.14 ± 0.00 c	0.75 ± 0.02 b	4.53 ± 0.12 a	n.d.	0.12 ± 0.00 c
Pelargonidin-O-Glucoside	n.d.	n.d.	n.d.	n.d.	0.22 ± 0.03 a	0.06 ± 0.01 b	n.d.	n.d.
Cyanidin-3-O-Glucoside	n.d.	n.d.	n.d.	n.d.	3.13 ± 0.23 a	0.93 ± 0.01 b	n.d.	n.d.
Peonidin-3-O-Glucoside	n.d.	n.d.	n.d.	n.d.	0.19 ± 0.01 a	0.05 ± 0.00 b	n.d.	n.d.
Delphinidin-O-Glucoside	n.d.	n.d.	n.d.	n.d.	n.d.	0.04 ± 0.00	n.d.	n.d.
Pelargonidin-O-Acetylglucoside	n.d.	n.d.	n.d.	n.d.	0.22 ± 0.03 a	0.05 ± 0.00 b	n.d.	n.d.
Cyanidin-O-Acetylglucoside	n.d.	n.d.	n.d.	n.d.	4.73 ± 0.17 a	1.56 ± 0.07 b	n.d.	n.d.
Peonidin-O-Acetylglucoside	n.d.	n.d.	n.d.	n.d.	0.26 ± 0.03	n.d.	n.d.	n.d.
Delphinidin-O-Acetylglucoside	n.d.	n.d.	n.d.	n.d.	0.08 ± 0.01 a	0.04 ± 0.00 a	n.d.	n.d.
Pelargonidin-O-Malonylglucoside	n.d.	n.d.	n.d.	n.d.	0.54 ± 0.04 a	0.11 ± 0.00 b	n.d.	n.d.
Cyanidin-O-Malonylglucoside	n.d.	n.d.	n.d.	n.d.	2.93 ± 0.18 a	0.51 ± 0.03 b	n.d.	n.d.
Peonidin-O-Malonylglucoside	n.d.	n.d.	n.d.	n.d.	0.44 ± 0.00 a	0.07 ± 0.01 b	n.d.	n.d.
Delphinidin-O-Malonylglucoside	n.d.	n.d.	n.d.	n.d.	0.13 ± 0.01 a	0.03 ± 0.00 b	n.d.	n.d.
Pelargonidin-O-Dimalonylglucoside	n.d.	n.d.	n.d.	n.d.	0.07 ± 0.00 a	0.01 ± 0.00 b	n.d.	n.d.
Cyanidin-O-Dimalonylglucoside	n.d.	n.d.	n.d.	n.d.	1.36 ± 0.07 a	0.22 ± 0.01 b	n.d.	n.d.
Peonidin-O-Dimalonylglucoside	n.d.	n.d.	n.d.	n.d.	0.04 ± 0.00	n.d.	n.d.	n.d.
Total Anthocyanins	n.d.	n.d.	n.d.	n.d.	14.35 ± 0.8 a	3.67 ± 0.12 b	n.d.	n.d.
4-Hydroxybenzoic acid	0.97 ± 0.04 b	0.29 ± 0.01 e	0.84 ± 0.06 bc	0.31 ± 0.01 de	1.5 ± 0.05 a	0.49 ± 0.04 d	1.38 ± 0.01 a	0.69 ± 0.02 c
3,4-Dihydroxybenzoic acid	n.d.	n.d.	n.d.	n.d.	10.96 ± 0.81 a	2.92 ± 0.36 b	n.d.	n.d.
4'-Hydroxycinnamic acid (cis/trans)	n.d.	n.d.	n.d.	n.d.	n.d.	n.d.	1.57 ± 0.00	n.d.
4-Hydroxy-3-methoxybenzoic acid	1.4 ± 0.13 b	n.d.	1.76 ± 0.44 b	n.d.	3.59 ± 0.2 a	n.d.	n.d.	n.d.
3-Hydroxy-4-methoxybenzoic acid	n.d.	n.d.	n.d.	n.d.	n.d.	n.d.	1.53 ± 0.13 a	0.34 ± 0.04 b
4'-Hydroxy-3'-methoxycinnamic acid (cis/trans)	3.3 ± 0.03 a	0.83 ± 0.08 c	2.6 ± 0.12 ab	1.17 ± 0.08 c	2.96 ± 0.34 a	0.75 ± 0.02 c	2.11 ± 0.15 b	0.67 ± 0.07 c
3'-Hydroxy-4'-methoxycinnamic acid (cis/trans)	1.98 ± 0.04 ab	0.36 ± 0.01 d	2.68 ± 0.08 a	0.73 ± 0.13 cd	1.44 ± 0.19 bc	n.d.	1.57 ± 0.29 b	0.34 ± 0.02 d
3,5-Dimethoxy-4-hydroxybenzoic acid	n.d.	n.d.	n.d.	n.d.	n.d.	n.d.	0.38 ± 0.03	n.d.
Syringaldehyde	n.d.	n.d.	n.d.	n.d.	n.d.	n.d.	0.34 ± 0.02	n.d.
Total Free phenolic acids	7.65 ± 0.16 b	1.48 ± 0.07 d	7.88 ± 0.46 b	2.22 ± 0.2 d	20.45 ± 0.51 a	4.16 ± 0.34 c	8.88 ± 0 b	2.03 ± 0.04 d
B_4-Hydroxybenzoic acid	1.01 ± 0.12 d	2.9 ± 0.03 b	0.38 ± 0.00 e	2.1 ± 0.02 c	0.41 ± 0.03 e	3.88 ± 0.10 a	0.29 ± 0.03 e	2.69 ± 0.15 b
B_Hydroxybenzoic acid	n.d.	n.d.	0.5 ± 0.02 a	0.57 ± 0.08 a	0.49 ± 0.03 a	0.43 ± 0.03 a	0.48 ± 0.02 a	0.47 ± 0.00 a
B_3,4-Dihydroxybenzoic acid	n.d.	n.d.	n.d.	n.d.	n.d.	1.09 ± 0.10	n.d.	n.d.
B_4'-Hydroxycinnamic acid (cis/trans)	1 ± 0.03 c	57.23 ± 2.71 a	0.81 ± 0.11 c	34.73 ± 1.27 b	0.53 ± 0.01 c	24.29 ± 0.03 b	0.93 ± 0.07 c	76.1 ± 9.75 a
B_3'-Hydroxycinnamic acid (cis/trans)	0.64 ± 0.02 c	15.12 ± 0.12 a	0.49 ± 0.03 c	8.2 ± 0.13 b	0.22 ± 0.01 c	3.91 ± 0.00c	0.23 ± 0.05 c	13.71 ± 2.13 a
B_4-Hydroxy-3-methoxybenzoic acid	0.33 ± 0.01 d	4.48 ± 0.04 b	0.41 ± 0.06 d	3.79 ± 0.11 c	0.52 ± 0.02 d	5.83 ± 0.26 a	0.35 ± 0.01 d	4.74 ± 0.18 b
B_3',4'-Dihydroxycinnamic acid	n.d.	n.d.	n.d.	0.2 ± 0.01 a	n.d.	0.17 ± 0.02 a	n.d.	n.d.
B_4'-Hydroxy-3'-methoxycinnamic acid (cis/trans)	51.02 ± 2.6 c	350.22 ± 16.15 a	50.36 ± 1.52 c	292.45 ± 5.32 b	24.56 ± 0.31 c	284.04 ± 0.6 b	59.17 ± 1.86 c	263.22 ± 7.77 b
B_3'-Hydroxy-4'-methoxycinnamic acid (cis/trans)	35.86 ± 7.07 d	170.38 ± 6.53 a	34.16 ± 1.99 d	120.56 ± 3.21 b	19.55 ± 0.64 d	82.65 ± 0.28 c	27.38 ± 0.91 d	72.26 ± 4.91 c
B_3,5-Dimethoxy-4-hydroxybenzoic acid	n.d.	n.d.	n.d.	0.41 ± 0.02 c	0.05 ± 0.00 d	0.68 ± 0.00 b	n.d.	0.82 ± 0.01 a
B_3,5-Dimethoxy-4-hydroxycinnamic acid	n.d.	n.d.	n.d.	13.21 ± 0.03 ab	n.d.	16.77 ± 0.04 a	n.d.	9.51 ± 1.13 b
B_4'-Hydroxy-3'-methoxycinnamic acid-O-pentoside	n.d.	0.35 ± 0.02 b	n.d.	0.34 ± 0.02 b	n.d.	0.65 ± 0.01 a	n.d.	0.41 ± 0.01 b
B_3',4'-Dihydroxycinnamic acid-O-hexoside	n.d.	n.d.	n.d.	0.07 ± 0.00 a	n.d.	0.06 ± 0.00 a	n.d.	0.03 ± 0.00 b
B_3,5-Dimethoxy-4-hydroxycinnamic acid-O-hexoside	n.d.	n.d.	n.d.	11.78 ± 0.46 a	n.d.	14.01 ± 0.88 a	n.d.	7.91 ± 0.41 b
B_8/5-5'-Diferulic acid	0.52 ± 0.12 e	44.73 ± 3.95 b	0.5 ± 0.01 e	35.6 ± 1.39 c	0.18 ± 0.02 e	55.14 ± 0.27 a	0.7 ± 0.07 e	25.82 ± 0.91 d
B_TriFerulic acid	0.03 ± 0.01 d	1.76 ± 0.21 b	0.03 ± 0.01 d	1.54 ± 0.01 b	n.d.	2.66 ± 0.13 a	n.d.	0.82 ± 0.04 c
B_Cinnamic acid	n.d.	n.d.	n.d.	0.19 ± 0.03 b	n.d.	1.62 ± 0.01 a	n.d.	0.15 ± 0 b
B_Diferulic acid decarboxylated form	0.37 ± 0.01 e	13.48 ± 0.8 b	0.25 ± 0.01 e	10.4 ± 0.27 c	0.23 ± 0.03 e	21.13 ± 0.14 a	0.23 ± 0.01 e	5.79 ± 0.05 d
B_Diferulic acid reduced decarboxylated form	n.d.	0.61 ± 0.02	n.d.	n.d.	n.d.	n.d.	n.d.	n.d.
B_Syringaldehyde	0.11 ± 0.01 b	1.12 ± 0.02 a	0.07 ± 0.00 b	1.04 ± 0.01 a	0.11 ± 0.00 b	1.04 ± 0.04 a	n.d.	1.07 ± 0.05 a
Total Bound phenolic acids	90.89 ± 9.65 c	662.39 ± 23.2 a	87.94 ± 3.68 c	537.19 ± 10.99 b	46.87 ± 0.43 c	520.04 ± 1.85 b	89.75 ± 1.22 c	485.51 ± 27.41 b
Total phenolic compounds	121.54 ± 8.75 d	686.29 ± 25.17 a	135.39 ± 3.94 d	580.94 ± 8.21 b	230.63 ± 4.82 c	660.43 ± 6.34 a	132.36 ± 0.94 d	502.39 ± 27.03 b
Values are expressed as mean ± SD and represent the recovered amount of each phenolic compound, calculated from their concentration in each fraction, corrected for the dry weight of the corresponding fraction and normalized to the dry weight of the initial extruded sample. Statistical differences were evaluated by two-way ANOVA considering product and fraction type (bioaccessible vs non-bioaccess…

## Sheet: Supplementary_Table_3
Supplementary Table 3. Concentrations of short-chain fatty acids (µmol g⁻¹) during in vitro colonic fermentation (0 - 48 h) of the digestion control and extruded barley samples.
	Fermentation time	Acetic acid	Propionic acid	Isobutyric acid	Butyric acid	Isovaleric acid	Valeric acid	Hexanoic acid
Control B	0 h	44.56 ± 0 q	9.97 ± 0 h	1.63 ± 0 i	11.43 ± 0 h	3.41 ± 0 fg	2.56 ± 0 g	1.38 ± 0 h
Annapurna®	0 h	63.96 ± 5.61 pq	11.72 ± 1.76 h	1.28 ± 0.15 i	10.89 ± 2.06 h	4.57 ± 0.19 fg	2.22 ± 0.49 g	1.63 ± 0.31 h
Hilose®	0 h	77.65 ± 0.29 nop	10.59 ± 0.55 h	1.61 ± 0.16 i	11.53 ± 0.83 h	5.15 ± 0.27 fg	2.2 ± 0.08 g	1.35 ± 0.13 h
DHL-151340	0 h	93.75 ± 4.77 mno	9.63 ± 0.39 h	1.45 ± 0.1 i	10.1 ± 0.39 h	4.83 ± 0.17 fg	1.75 ± 0 g	1.89 ± 0.01 h
SBExpCE	0 h	68.06 ± 0.18 opq	10.91 ± 0.46 h	1.78 ± 0.23 i	11.71 ± 1.07 h	5.48 ± 0.33 fg	2.07 ± 0.12 g	1.84 ± 0.04 h
Control B	2 h	52.95 ± 0 pq	8.03 ± 0 h	4.86 ± 0 ghi	12.35 ± 0 h	3.17 ± 0 efg	2.78 ± 0 g	6.6 ± 0 gh
Annapurna®	2 h	115.84 ± 0.12 klm	9.02 ± 0.19 h	4.14 ± 0.73 hi	8.4 ± 0.13 h	5.62 ± 0.4 efg	2.22 ± 0.05 g	2.37 ± 0.06 h
Hilose®	2 h	122.54 ± 9.63 jkl	8.21 ± 0.47 h	4.07 ± 0.16 hi	6.97 ± 2.47 h	3.28 ± 0.45 fg	3.71 ± 0.09 g	6.83 ± 0.3 gh
DHL-151340	2 h	137.58 ± 3.46. ijkl	8.66 ± 0.44 h	11.39 ± 0.02 ef	5.77 ± 0.22 h	3.77 ± 0.09 fg	1.5 ± 0 g	5.71 ± 0.89 gh
SBExpCE	2 h	120.8 ± 0.16 jkl	8.05 ± 0.1 h	4.21 ± 0.03hi	10.37 ± 0.19 h	3.32 ± 0.38 fg	2.64 ± 0.07 g	5.06 ± 0.57 gh
Control B	6 h	104.93 ± 0 lmn	8.59 ± 0 h	7.3 ± 0 fghi	12.36 ± 0 h	2.73 ± 0 efg	1.81 ± 0 g	5.57 ± 0 gh
Annapurna®	6 h	138.57 ± 2.75 ijk	6.13 ± 0.37 h	2.67 ± 0.04 i	5.03 ± 0.41 h	4.47 ± 0.99 fg	0.88 ± 0.05 g	1.43 ± 0.16 h
Hilose®	6 h	147.32 ± 2.69 ghij	4.89 ± 0.23 h	10.17 ± 0.09 fg	5.4 ± 0.07 h	3.4 ± 0.02 fg	2.6 ± 0.34 g	4.97 ± 0.08 gh
DHL-151340	6 h	166.77 ± 7.13 efgh	4.99 ± 0.25 h	12.18 ± 0.38 ef	5.36 ± 0.23 h	3.63 ± 0.25 fg	1.47 ± 0 g	4.57 ± 0.06 gh
SBExpCE	6 h	175.81 ± 3.45 ef	5.24 ± 0.08 h	4.99 ± 0.09hi	5.32 ± 0.02 h	3.74 ± 0.18 fg	5.96 ± 0.42 g	3.88 ± 0.32 gh
Control B	10 h	179.12 ± 0 efg	41.17 ± 0 efg	20.9 ± 0 d	11.8 ± 0 h	3.41 ± 0 efg	1.62 ± 0 g	5.43 ± 0 gh
Annapurna®	10 h	132.83 ± 4.61 ijkl	5.7 ± 0.06 h	2.47 ± 0 i	5.31 ± 0.17 h	3.49 ± 0.41 fg	2.81 ± 0.1 g	4.21 ± 0.01 gh
Hilose®	10 h	142.86 ± 2.41hij	5.11 ± 0.19 h	8.98 ± 0.3 fgh	5.64 ± 0.61 h	2.16 ± 0.03 fg	2.8 ± 0.57 g	3.75 ± 0.13 gh
DHL-151340	10 h	183.07 ± 3.99 e	5.33 ± 0.01 h	2.9 ± 0.11 i	5.43 ± 0.12 h	2.64 ± 0.13 g	11.64 ± 0.3 g	4.58 ± 0.21 gh
SBExpCE	10 h	126.38 ± 1.98 jkl	3.19 ± 0.37 h	8.61 ± 0.01 fgh	3.49 ± 0.29 h	7.99 ± 0.15 efg	8.04 ± 0.29 g	31.37 ± 2.32 ef
Control B	24 h	322.06 ± 0 b	100.11 ± 0 b	16.81 ± 0 de	144.72 ± 0 fg	6.46 ± 0 efg	12.41 ± 0 g	15.42 ± 0 fgh
Annapurna®	24 h	243.04 ± 4.34 cd	78.17 ± 1.26 c	4.82 ± 0.19 hi	316.63 ± 4.17 d	40.23 ± 2.54 d	158.93 ± 2.63 c	55.08 ± 0.06 d
Hilose®	24 h	190.67 ± 4.77 e	47.22 ± 2.65 efg	2.93 ± 0.07 i	268.39 ± 10.49 e	24.58 ± 0.7 de	115.42 ± 1.82 d	42.72 ± 1.78 de
DHL-151340	24 h	314 ± 4.02 b	80.55 ± 10.14 bc	2.78 ± 0.4 i	269.93 ± 4.41 e	21.42 ± 3.25 def	90.99 ± 6.88 de	44 ± 1.26 de
SBExpCE	24 h	265.99 ± 10.59 c	50.87 ± 3.63 ef	11.7 ± 0.03 ef	128.17 ± 4.05 g	11.03 ± 0.09 efg	54.45 ± 0.41 f	58.16 ± 2.11 d
Control B	48 h	713.57 ± 0 a	204.86 ± 0 a	69.59 ± 0 a	177.05 ± 0 f	193.2 ± 0 a	69.95 ± 0 ef	27.25 ± 0 efg
Annapurna®	48 h	238.79 ± 3.43 d	74.49 ± 1.39 cd	44.48 ± 3.25 c	524.57 ± 1.29 a	160.2 ± 15.4 b	245.53 ± 20.61 a	169.48 ± 12.12 a
Hilose®	48 h	188.17 ± 0.86 e	58.45 ± 6.09 de	50.9 ± 2.27 b	504.39 ± 13.96 a	157.09 ± 0.23 b	187.54 ± 0.62 b	103.17 ± 1.06 c
DHL-151340	48 h	155.62 ± 5.38 fghi	32.21 ± 1.97 g	15.35 ± 0.14 de	442.7 ± 10.67 b	77.38 ± 0.45 c	159.22 ± 1.02 c	140.71 ± 5.51 b
SBExpCE	48 h	183.16 ± 1.17 e	35.57 ± 3.39 fg	15.82 ± 0.44 de	414.47 ± 7.86 c	79.19 ± 2.07 c	195.3 ± 4.36 b	151.65 ± 8.97 ab
Values are expressed as mean ± SD. Data were analysed by two-way ANOVA considering product type and fermentation time as fixed factors, including their interaction. Multiple comparisons were performed using the Games–Howell post hoc test (p < 0.05). Different lowercase letters indicate significant differences among product × time combinations for each short-chain fatty acid.

## Sheet: Supplementary_Table_4
Supplementary Table 4. Phenolic profile (µmol 100g⁻¹) of native phenolic compounds and phenolic metabolites during in vitro colonic fermentation (0-48h) of the digestion control and four barley extrudates.
	Control	Control	Control	Control	Control	Control	Annapurna®	Annapurna®	Annapurna®	Annapurna®	Annapurna®	Annapurna®	Hilose®	Hilose®	Hilose®	Hilose®	Hilose®	Hilose®	DHL-151340	DHL-151340	DHL-151340	DHL-151340	DHL-151340	DHL-151340	SBExpCE	SBExpCE	SBExpCE	SBExpCE	SBExpCE	SBExpCE
Time	0 h	2 h	6 h	10 h	24 h	48 h	0 h	2 h	6 h	10 h	24 h	48 h	0 h	2 h	6 h	10 h	24 h	48 h	0 h	2 h	6 h	10 h	24 h	48 h	0 h	2 h	6 h	10 h	24 h	48 h
Epicatechin	n.d.	n.d.	n.d.	n.d.	n.d.	n.d.	n.d.	n.d.	n.d.	n.d.	n.d.	n.d.	n.d.	n.d.	n.d.	n.d.	n.d.	n.d.	n.d.	n.d.	0.69 ± 0.04 d	1.2 ± 0.1 b	1.53 ± 0.07 a	0.95 ± 0.04 c	n.d.	n.d.	n.d.	n.d.	n.d.	n.d.
Total Flavan-3-ols	n.d.	n.d.	n.d.	n.d.	n.d.	n.d.	n.d.	n.d.	n.d.	n.d.	n.d.	n.d.	n.d.	n.d.	n.d.	n.d.	n.d.	n.d.	n.d.	n.d.	0.69 ± 0.04 d	1.2 ± 0.1 b	1.53 ± 0.07 a	0.95 ± 0.04 c	n.d.	n.d.	n.d.	n.d.	n.d.	n.d.
Apigenin-6-C-Arabinoside-8-C-Glucoside	n.d.	n.d.	n.d.	n.d.	n.d.	n.d.	0.03 ± 0.01 cdef	0.03 ± 0 cdef	0.04 ± 0 cde	0.03 ± 0 cdef	0.04 ± 0 cd	0.04 ± 0 c	0.02 ± 0 ef	n.d.	n.d.	n.d.	n.d.	n.d.	0.08 ± 0.01 b	0.08 ± 0 b	0.09 ± 0 b	0.08 ± 0.01 b	0.11 ± 0 a	0.13 ± 0.01 a	0.02 ± 0 def	0.02 ± 0 def	0.01 ± 0 fg	0.03 ± 0 cdef	0.01 ± 0 fg	0.02 ± 0 def
Apigenin-O-Glucoside	n.d.	n.d.	n.d.	n.d.	n.d.	n.d.	n.d.	n.d.	n.d.	n.d.	n.d.	n.d.	n.d.	n.d.	n.d.	n.d.	n.d.	n.d.	0.03 ± 0 c	0.05 ± 0 ab	0.05 ± 0.01 a	0.04 ± 0.01 ab	0.04 ± 0 abc	0.03 ± 0.01 bc	n.d.	n.d.	n.d.	n.d.	n.d.	n.d.
Isoorientin	n.d.	n.d.	n.d.	n.d.	n.d.	n.d.	0.05 ± 0.01 fghi	0.11 ± 0 de	0.12 ± 0.01 de	0.13 ± 0 cd	0.17 ± 0 b	0.13 ± 0 cde	0.04 ± 0.01 ghijk	0.05 ± 0 fghij	0.06 ± 0 fg	0.07 ± 0 f	0.1 ± 0 e	0.11 ± 0 de	0.05 ± 0 fgh	0.12 ± 0.01 de	0.11 ± 0.01 de	0.12 ± 0.01 de	0.16 ± 0.01 bc	0.21 ± 0.02 a	0.01 ± 0 kl	0.02 ± 0 jkl	0.02 ± 0 ijkl	0.03 ± 0 hijkl	0.03 ± 0 hijkl	0.04 ± 0 ghij
Isovitexin-7-O-Glucoside	n.d.	n.d.	n.d.	n.d.	n.d.	n.d.	n.d.	n.d.	n.d.	n.d.	n.d.	n.d.	n.d.	n.d.	n.d.	n.d.	n.d.	n.d.	0.05 ± 0.01 a	n.d.	n.d.	n.d.	n.d.	n.d.	n.d.	n.d.	n.d.	n.d.	n.d.	n.d.
Isoscoparin-7-O-Glucoside	n.d.	n.d.	n.d.	n.d.	n.d.	n.d.	0.12 ± 0.01 a	n.d.	n.d.	n.d.	n.d.	n.d.	n.d.	n.d.	n.d.	n.d.	n.d.	n.d.	0.09 ± 0 b	0.01 ± 0 c	n.d.	n.d.	n.d.	n.d.	n.d.	n.d.	n.d.	n.d.	n.d.	n.d.
Luteolin	n.d.	n.d.	n.d.	n.d.	n.d.	n.d.	0.04 ± 0.01 e	0.06 ± 0 e	n.d.	n.d.	n.d.	n.d.	0.06 ± 0.01 e	0.06 ± 0.01 e	0.07 ± 0.01 e	0.09 ± 0 e	0.11 ± 0.01 e	n.d.	17.49 ± 1.56 a	13.56 ± 0.29 b	12.04 ± 0.72 b	9.7 ± 0.61 c	5.41 ± 0.62 d	0.23 ± 0.02 e	0.03 ± 0 e	0.05 ± 0 e	0.06 ± 0 e	0.09 ± 0 e	0.11 ± 0.01 e	n.d.
Methyl luteolin (chrysoeriol)	n.d.	n.d.	n.d.	n.d.	n.d.	n.d.	0.13 ± 0 d	0.12 ± 0 d	0.11 ± 0 d	0.29 ± 0.01 cd	0.34 ± 0.01 cd	0.17 ± 0 d	0.28 ± 0 cd	0.21 ± 0.03 d	0.3 ± 0.02 cd	0.72 ± 0.03 cd	0.5 ± 0.03 cd	0.15 ± 0.01 d	26.23 ± 2.48 a	18.03 ± 1 b	17.5 ± 0.57 b	17.71 ± 1.14 b	17.04 ± 0.2 b	3.52 ± 0.1 c	0.38 ± 0.02 cd	0.73 ± 0.01 cd	0.51 ± 0.01 cd	0.63 ± 0 cd	0.55 ± 0.01 cd	0.49 ± 0 cd
Luteolin-7-O-Glucuronide	n.d.	n.d.	n.d.	n.d.	n.d.	n.d.	0.01 ± 0 d	n.d.	n.d.	n.d.	n.d.	n.d.	n.d.	n.d.	n.d.	n.d.	n.d.	n.d.	0.43 ± 0 a	0.08 ± 0.01 b	0.02 ± 0 c	0.01 ± 0 d	n.d.	n.d.	n.d.	n.d.	n.d.	n.d.	n.d.	n.d.
Methyl luteolin-O-Glucuronide	n.d.	n.d.	n.d.	n.d.	n.d.	n.d.	n.d.	n.d.	n.d.	n.d.	n.d.	n.d.	n.d.	n.d.	n.d.	n.d.	n.d.	n.d.	0.84 ± 0.06 a	0.12 ± 0.01 b	0.05 ± 0 bc	0.02 ± 0 c	0.01 ± 0 c	0.01 ± 0 c	n.d.	n.d.	n.d.	n.d.	n.d.	n.d.
Total Free Flavones	n.d.	n.d.	n.d.	n.d.	n.d.	n.d.	0.38 ± 0.01 d	0.32 ± 0 d	0.27 ± 0.01 d	0.45 ± 0.01 d	0.55 ± 0.01 d	0.34 ± 0 d	0.4 ± 0.01 d	0.31 ± 0.03 d	0.42 ± 0.04 d	0.87 ± 0.03 d	0.71 ± 0.02 d	0.26 ± 0.01 d	45.29 ± 3.97 a	32.05 ± 1.3 b	29.86 ± 0.14 b	27.68 ± 1.74 bc	22.76 ± 0.81 c	4.13 ± 0.12 d	0.44 ± 0.01 d	0.81 ± 0.01 d	0.6 ± 0.01 d	0.77 ± 0.01 d	0.7 ± 0.02 d	0.55 ± 0 d
B_Luteolin	n.d.	n.d.	n.d.	n.d.	n.d.	n.d.	n.d.	n.d.	n.d.	n.d.	n.d.	n.d.	n.d.	n.d.	n.d.	n.d.	n.d.	n.d.	0.64 ± 0.02 a	0.28 ± 0.01 b	0.13 ± 0 c	0.08 ± 0 d	0.07 ± 0 de	0.04 ± 0 e	n.d.	n.d.	n.d.	n.d.	n.d.	n.d.
B_Apigenin-6-C-arabinoside-8-C-glucoside	n.d.	n.d.	n.d.	n.d.	n.d.	n.d.	n.d.	n.d.	n.d.	n.d.	n.d.	n.d.	n.d.	n.d.	n.d.	n.d.	n.d.	n.d.	0.1 ± 0.01 ab	0.06 ± 0 bcd	0.06 ± 0 cd	0.12 ± 0.02 a	0.08 ± 0 bc	0.12 ± 0.02 a	0.07 ± 0.01 bcd	0.07 ± 0 bcd	0.05 ± 0.01 d	0.05 ± 0 d	0.07 ± 0 bcd	0.09 ± 0.01 abc
B_Apigenin-O-Glucoside	n.d.	n.d.	n.d.	n.d.	n.d.	n.d.	n.d.	n.d.	n.d.	n.d.	n.d.	n.d.	n.d.	n.d.	n.d.	n.d.	n.d.	n.d.	0.06 ± 0 a	0.04 ± 0.01 bc	0.03 ± 0 d	0.04 ± 0 bc	0.03 ± 0 cd	0.06 ± 0 a	0.04 ± 0.01 bc	0.03 ± 0 cd	0.05 ± 0 ab	0.05 ± 0 ab	0.03 ± 0 cd	0.02 ± 0 d
B_Isoorientin	n.d.	n.d.	n.d.	n.d.	n.d.	n.d.	n.d.	n.d.	n.d.	n.d.	n.d.	n.d.	n.d.	n.d.	n.d.	n.d.	n.d.	n.d.	0.15 ± 0.03 a	0.13 ± 0.01 ab	0.13 ± 0.03 ab	0.1 ± 0.01 abc	0.09 ± 0 bc	0.11 ± 0.01 ab	0.06 ± 0 cd	0.11 ± 0.01 ab	0.09 ± 0 bc	0.03 ± 0 de	0.01 ± 0 de	0.03 ± 0 de
B_Isovitexin-7-O-Glucoside	n.d.	n.d.	n.d.	n.d.	n.d.	n.d.	n.d.	n.d.	n.d.	n.d.	n.d.	n.d.	n.d.	n.d.	n.d.	n.d.	n.d.	n.d.	0.06 ± 0.01 a	0.03 ± 0 b	0.02 ± 0 c	0.01 ± 0 c	0.03 ± 0 b	0.04 ± 0 b	n.d.	n.d.	n.d.	n.d.	n.d.	n.d.
B_Isoscoparin-7-O-Glucoside	n.d.	n.d.	n.d.	n.d.	n.d.	n.d.	0.18 ± 0.01 ab	0.17 ± 0.01 ab	0.19 ± 0.01 a	0.2 ± 0.01 a	0.19 ± 0.01 a	0.17 ± 0 ab	0.08 ± 0.01 c	0.03 ± 0 f	0.03 ± 0 fg	0.02 ± 0 fg	0.02 ± 0 fg	0.03 ± 0 f	0.16 ± 0.01 b	0.08 ± 0 cd	0.03 ± 0 fg	0.03 ± 0 f	0.03 ± 0 f	0.05 ± 0 def	0.07 ± 0 cde	0.04 ± 0.01 ef	0.05 ± 0 ef	0.04 ± 0 ef	0.03 ± 0 f	n.d.
B_Methyl luteolin (chrysoeriol)	n.d.	n.d.	n.d.	n.d.	n.d.	n.d.	0.01 ± 0 h	0.02 ± 0 h	0.02 ± 0 h	0.02 ± 0 h	0.02 ± 0 h	0.02 ± 0 h	0.02 ± 0 h	0.02 ± 0 h	0.04 ± 0 gh	0.04 ± 0 gh	0.03 ± 0 h	0.02 ± 0 h	0.84 ± 0.02 d	1.5 ± 0.08 b	1.82 ± 0.01 a	1.17 ± 0.06 c	0.92 ± 0.02 d	0.55 ± 0.01 e	0.08 ± 0 fgh	0.04 ± 0 gh	0.15 ± 0 fg	0.18 ± 0 f	0.2 ± 0 f	0.1 ± 0.02 fgh
B_Luteolin-7-O-Glucuronide	n.d.	n.d.	n.d.	n.d.	n.d.	n.d.	n.d.	n.d.	n.d.	n.d.	n.d.	n.d.	n.d.	0.01 ± 0 d	0.01 ± 0 d	0.01 ± 0 d	0.01 ± 0 d	0.01 ± 0 d	0.33 ± 0.02 a	0.19 ± 0 b	0.13 ± 0.01 c	0.13 ± 0.03 c	0.14 ± 0 c	0.17 ± 0.02 bc	0.01 ± 0 d	0.02 ± 0.01 d	0.02 ± 0 d	0.01 ± 0 d	0.02 ± 0 d	0.01 ± 0 d
B_Methyl luteolin-O-Glucuronide	n.d.	n.d.	n.d.	n.d.	n.d.	n.d.	n.d.	n.d.	n.d.	n.d.	n.d.	n.d.	n.d.	n.d.	n.d.	n.d.	n.d.	n.d.	0.71 ± 0.02 a	0.44 ± 0 b	0.27 ± 0 c	0.26 ± 0.06 c	0.36 ± 0.01 bc	0.29 ± 0.08 c	n.d.	n.d.	n.d.	n.d.	n.d.	n.d.
Total Bound Flavones	n.d.	n.d.	n.d.	n.d.	n.d.	n.d.	0.19 ± 0.01 ijkl	0.19 ± 0.01 ijkl	0.21 ± 0.01 ijk	0.22 ± 0.01 ij	0.21 ± 0.01 ijk	0.19 ± 0 ijkl	0.1 ± 0.01 jklm	0.06 ± 0.01 lm	0.08 ± 0 klm	0.07 ± 0 lm	0.06 ± 0 lm	0.06 ± 0 lm	3.05 ± 0.02 a	2.76 ± 0.07 b	2.62 ± 0.03 c	1.95 ± 0.01 d	1.76 ± 0.03 e	1.44 ± 0.1 f	0.32 ± 0.02 ghi	0.3 ± 0 ghi	0.41 ± 0.01 g	0.36 ± 0 gh	0.36 ± 0.01 gh	0.26 ± 0.03 hi
Pelargonidin-O-Glucoside	n.d.	n.d.	n.d.	n.d.	n.d.	n.d.	n.d.	n.d.	n.d.	n.d.	n.d.	n.d.	n.d.	n.d.	n.d.	n.d.	n.d.	n.d.	0.03 ± 0 a	0.01 ± 0 b	n.d.	n.d.	n.d.	n.d.	n.d.	n.d.	n.d.	n.d.	n.d.	n.d.
Cyanidin-3-O-Glucoside	n.d.	n.d.	n.d.	n.d.	n.d.	n.d.	n.d.	n.d.	n.d.	n.d.	n.d.	n.d.	n.d.	n.d.	n.d.	n.d.	n.d.	n.d.	0.32 ± 0.02 a	0.04 ± 0 b	0.01 ± 0 c	n.d.	n.d.	n.d.	n.d.	n.d.	n.d.	n.d.	n.d.	n.d.
Peonidin-O-Glucoside	n.d.	n.d.	n.d.	n.d.	n.d.	n.d.	n.d.	n.d.	n.d.	n.d.	n.d.	n.d.	n.d.	n.d.	n.d.	n.d.	n.d.	n.d.	0.05 ± 0 a	0.01 ± 0 b	n.d.	n.d.	n.d.	n.d.	n.d.	n.d.	n.d.	n.d.	n.d.	n.d.
Cyanidin-O-Acetylglucoside	n.d.	n.d.	n.d.	n.d.	n.d.	n.d.	n.d.	n.d.	n.d.	n.d.	n.d.	n.d.	n.d.	n.d.	n.d.	n.d.	n.d.	n.d.	0.26 ± 0.01 a	0.07 ± 0 b	0.03 ± 0 c	0.02 ± 0 d	n.d.	n.d.	n.d.	n.d.	n.d.	n.d.	n.d.	n.d.
Delphinidin-O-Acetylglucoside	n.d.	n.d.	n.d.	n.d.	n.d.	n.d.	n.d.	n.d.	n.d.	n.d.	n.d.	n.d.	n.d.	n.d.	n.d.	n.d.	n.d.	n.d.	0.01 ± 0 a	n.d.	n.d.	n.d.	n.d.	n.d.	n.d.	n.d.	n.d.	n.d.	n.d.	n.d.
Pelargonidin-O-Malonylglucoside	n.d.	n.d.	n.d.	n.d.	n.d.	n.d.	n.d.	n.d.	n.d.	n.d.	n.d.	n.d.	n.d.	n.d.	n.d.	n.d.	n.d.	n.d.	0.02 ± 0 a	n.d.	n.d.	n.d.	n.d.	n.d.	n.d.	n.d.	n.d.	n.d.	n.d.	n.d.
Cyanidin-O-Malonylglucoside	n.d.	n.d.	n.d.	n.d.	n.d.	n.d.	n.d.	n.d.	n.d.	n.d.	n.d.	n.d.	n.d.	n.d.	n.d.	n.d.	n.d.	n.d.	0.09 ± 0 a	0.02 ± 0 b	n.d.	n.d.	n.d.	n.d.	n.d.	n.d.	n.d.	n.d.	n.d.	n.d.
Cyanidin-O-Dimalonylglucoside	n.d.	n.d.	n.d.	n.d.	n.d.	n.d.	n.d.	n.d.	n.d.	n.d.	n.d.	n.d.	n.d.	n.d.	n.d.	n.d.	n.d.	n.d.	0.07 ± 0 a	0.03 ± 0 b	0 ± 0 c	d	n.d.	n.d.	n.d.	n.d.	n.d.	n.d.	n.d.	n.d.
Total Anthocyanins	n.d.	n.d.	n.d.	n.d.	n.d.	n.d.	n.d.	n.d.	n.d.	n.d.	n.d.	n.d.	n.d.	n.d.	n.d.	n.d.	n.d.	n.d.	0.85 ± 0.03 a	0.17 ± 0 b	0.05 ± 0 c	0.03 ± 0 cd	n.d.	n.d.	n.d.	n.d.	n.d.	n.d.	n.d.	n.d.
4-Hydroxybenzoic acid	0.4 ± 0.01 no	0.5 ± 0.06 mno	0.75 ± 0 jklm	0.88 ± 0.03 ijkl	1.22 ± 0.12 fgh	2.09 ± 0 b	0.73 ± 0.02 jklmn	0.97 ± 0.05 ghij	1.56 ± 0.03 def	1.69 ± 0.02 cd	2.48 ± 0.15 a	2.75 ± 0.04 a	0.71 ± 0.05 jklmn	0.62 ± 0.02 klmno	1.09 ± 0.07 ghi	1.19 ± 0.11 ghi	1.58 ± 0.12 de	2.01 ± 0.07 bc	0.49 ± 0.01 mno	0.62 ± 0.04 klmno	0.86 ± 0.02 ijkl	1.01 ± 0.05 ghij	1.3 ± 0.06 efg	1.88 ± 0.05 bcd	0.35 ± 0.01 o	0.33 ± 0.01 o	0.57 ± 0.05 lmno	0.91 ± 0.01 hijk	0.93 ± 0.09 hijk	1.3 ± 0.04 efg
Hydroxybenzoic acid	n.d.	n.d.	n.d.	n.d.	n.d.	n.d.	0.3 ± 0.04 klm	0.52 ± 0.02 ghij	0.63 ± 0 efgh	0.74 ± 0.03 cdef	0.96 ± 0.02 b	1.35 ± 0.05 a	0.42 ± 0.03 ijkl	0.53 ± 0.01 ghij	0.45 ± 0 ijk	0.48 ± 0.02 hij	0.81 ± 0.08 bcd	0.74 ± 0.02 cde	0.28 ± 0.02 lm	0.62 ± 0.04 efgh	0.61 ± 0.03 efgh	0.67 ± 0 defg	0.72 ± 0.04 cdef	0.87 ± 0.05 bc	0.19 ± 0.03 m	0.31 ± 0.03 klm	0.39 ± 0.02 jkl	0.45 ± 0 ijk	0.43 ± 0.05 ijkl	0.58 ± 0 fghi
Cinnamic acid	1.01 ± 0.01 k	4.19 ± 0.06 hi	14.75 ± 0.16 bc	18.17 ± 0.97 a	20.3 ± 1.17 a	0.81 ± 0.04 k	0.44 ± 0.04 k	0.91 ± 0.07 k	2.09 ± 0.08 ijk	3.81 ± 0.17 hij	4.08 ± 0.22 hi	7.18 ± 0.21 fg	0.16 ± 0.01 k	1.31 ± 0.1 jk	5.46 ± 0.34 gh	9.73 ± 0.06 ef	13.76 ± 0.97 bcd	11.69 ± 0.36 de	1.03 ± 0.09 k	2.76 ± 0.08 ijk	9.29 ± 0.3 ef	14.45 ± 0.07 bc	14.99 ± 1.03 bc	13.87 ± 0.1 bcd	0.91 ± 0.11 k	1.93 ± 0.01 ijk	8.08 ± 0.02 f	14.72 ± 0.31 bc	15.51 ± 0.07 b	12.48 ± 1.29 cd
3,4-Dihydroxybenzoic acid	n.d.	n.d.	n.d.	n.d.	n.d.	n.d.	n.d.	n.d.	n.d.	n.d.	n.d.	n.d.	n.d.	n.d.	n.d.	n.d.	n.d.	n.d.	2.01 ± 0.12 d	2.36 ± 0.25 cd	2.31 ± 0.01 cd	3.18 ± 0.06 b	4.08 ± 0.16 a	2.58 ± 0.1 c	n.d.	n.d.	n.d.	n.d.	n.d.	n.d.
4'-Hydroxycinnamic acid (cis/trans)	n.d.	n.d.	n.d.	n.d.	n.d.	n.d.	0.77 ± 0.03 a	n.d.	n.d.	n.d.	n.d.	n.d.	n.d.	n.d.	n.d.	n.d.	n.d.	n.d.	0.25 ± 0.01 b	n.d.	n.d.	n.d.	n.d.	n.d.	n.d.	n.d.	n.d.	n.d.	n.d.	n.d.
4-Hydroxy-3-methoxybenzoic acid	n.d.	n.d.	n.d.	n.d.	n.d.	n.d.	n.d.	n.d.	n.d.	n.d.	n.d.	n.d.	n.d.	n.d.	n.d.	n.d.	n.d.	n.d.	2.09 ± 0.06 ab	1.81 ± 0.03 bcd	1.62 ± 0.06 de	0.86 ± 0.01 f	0.83 ± 0.05 f	1.29 ± 0.02 e	1.77 ± 0.09 bcd	1.49 ± 0.19 de	1.99 ± 0.13 abc	2.19 ± 0.16 a	2.22 ± 0.12 a	1.72 ± 0.04 cd
3',4'-Dihydroxycinnamic acid	n.d.	n.d.	n.d.	n.d.	n.d.	n.d.	0.69 ± 0.02 a	0.44 ± 0.01 c	n.d.	n.d.	n.d.	n.d.	0.55 ± 0.04 b	n.d.	n.d.	n.d.	n.d.	n.d.	0.38 ± 0.02 c	0.4 ± 0 c	n.d.	n.d.	n.d.	n.d.	n.d.	n.d.	n.d.	n.d.	n.d.	n.d.
4'-Hydroxy-3'-methoxycinnamic acid (cis/trans)	n.d.	n.d.	n.d.	n.d.	n.d.	n.d.	5.14 ± 0.11 a	4.08 ± 0.17 b	2.66 ± 0.02 ef	2.06 ± 0.04 g	0.54 ± 0.04 kl	0.94 ± 0 ij	3.5 ± 0.08 c	1.98 ± 0.03 g	1.03 ± 0.05 i	0.56 ± 0.03 jkl	0.32 ± 0.07 klm	0.17 ± 0.03 lm	3.25 ± 0.07 cd	2.8 ± 0.06 ef	1.26 ± 0.01 hi	1.2 ± 0.15 hi	0.17 ± 0.01 lm	0.23 ± 0.01 klm	2.88 ± 0.03 de	2.48 ± 0.13 f	1.93 ± 0.11 g	1.47 ± 0.17 h	0.58 ± 0.03 jk	0.28 ± 0.02 klm
3'-Hydroxy-4'-methoxycinnamic acid (cis/trans)	n.d.	n.d.	n.d.	n.d.	n.d.	n.d.	0.54 ± 0.04 cd	1.13 ± 0.03 b	1.04 ± 0.01 b	1.32 ± 0 a	n.d.	n.d.	0.54 ± 0.07 cd	0.62 ± 0.07 c	0.42 ± 0.02 de	0.21 ± 0.01 gh	n.d.	n.d.	0.19 ± 0.01 ghi	0.22 ± 0.03 fgh	0.08 ± 0.01 ij	0.12 ± 0 hij	n.d.	n.d.	0.14 ± 0.01 hi	0.26 ± 0.01 fg	0.34 ± 0.01 ef	0.47 ± 0.02 d	n.d.	n.d.
Diferulic dicarboxylated form	n.d.	n.d.	n.d.	n.d.	n.d.	n.d.	n.d.	n.d.	n.d.	n.d.	n.d.	n.d.	n.d.	n.d.	n.d.	n.d.	n.d.	n.d.	0.08 ± 0 b	0.1 ± 0.01 b	0.14 ± 0.02 a	n.d.	n.d.	n.d.	n.d.	n.d.	n.d.	n.d.	n.d.	n.d.
3,5-Dimethoxy-4-hydroxybenzoic acid	n.d.	n.d.	n.d.	n.d.	n.d.	n.d.	n.d.	n.d.	n.d.	n.d.	n.d.	n.d.	n.d.	n.d.	n.d.	n.d.	n.d.	n.d.	0.07 ± 0 b	0.05 ± 0.01 c	0.08 ± 0 a	n.d.	n.d.	n.d.	n.d.	n.d.	n.d.	n.d.	n.d.	n.d.
Total Free phenolic acids	1.41 ± 0.01 m	4.69 ± 0.13 kl	15.5 ± 0.16 de	19.05 ± 1 bc	21.52 ± 1.28 ab	2.9 ± 0.04 lm	8.61 ± 0.05 ij	8.05 ± 0.32 ij	7.98 ± 0.14 ij	9.62 ± 0.21 hi	8.06 ± 0.05 ij	12.22 ± 0.13 fgh	5.88 ± 0.12 jk	5.05 ± 0.01 kl	8.45 ± 0.2 ij	12.17 ± 0.16 fgh	16.46 ± 1.09 cd	14.62 ± 0.31 def	10.13 ± 0.12 hi	11.75 ± 0.34 gh	16.25 ± 0.21 d	21.48 ± 0.2 ab	22.08 ± 1.02 a	20.71 ± 0.09 ab	6.24 ± 0.17 jk	6.82 ± 0.31 jk	13.31 ± 0.3 efg	20.22 ± 0.01 ab	19.67 ± 0.35 ab	16.36 ± 1.27 cd
B_4-Hydroxybenzoic acid	8.65 ± 0.82 defghi	10.69 ± 1.05 bcd	13.21 ± 0.07 a	11.39 ± 0.44 abc	11.77 ± 0.5 ab	10.83 ± 0.58 bc	6.52 ± 0.22 ijklmno	8.04 ± 0.11 fghijk	8.46 ± 0.28 efghij	7.67 ± 0.22 ghijkl	9.84 ± 0.21 bcdef	9.31 ± 0.13 cdefgh	5.1 ± 0.39 nop	6.78 ± 0.16 ijklmno	6.92 ± 0.18 ijklmn	7.4 ± 0.08 hijklm	10.01 ± 0.31 bcdef	9.69 ± 0.06 bcdefg	5.95 ± 0.03 klmno	6.5 ± 0.17 jklmno	5.86 ± 0.12 lmno	6.25 ± 0.18 klmno	5.78 ± 0.71 lmno	7.39 ± 0.03 hijklm	2.63 ± 0.15 q	4.67 ± 0.07 opq	5.36 ± 0.04 mno	3.19 ± 0.31 pq	8.63 ± 0.08 defghij	10.37 ± 0.46 bcde
B_Hydroxybenzoic acid	n.d.	0.7 ± 0.14 fghij	n.d.	n.d.	0.42 ± 0.36 hijk	0.56 ± 0.02 ghijk	0.53 ± 0.02 ghijk	0.79 ± 0.05 efghij	1.22 ± 0.05 abcdef	0.47 ± 0.04 hijk	1.71 ± 0.01 a	1.74 ± 0.15 a	n.d.	n.d.	0.41 ± 0.01 ijk	0.98 ± 0.02 cdefgh	1.19 ± 0.05 abcdef	1.3 ± 0.04 abcde	1.44 ± 0.13 abcd	1.5 ± 0.15 abc	1.37 ± 0.11 abcd	1.63 ± 0.16 ab	1.08 ± 0.03 bcdefg	1.52 ± 0.04 abc	0.22 ± 0.06 jk	0.4 ± 0.03 ijk	0.41 ± 0.03 ijk	0.43 ± 0.09 hijk	0.67 ± 0.03 fghij	0.93 ± 0.02 defghi
B_3,4-Dihydroxybenzoic acid	14.12 ± 0.56 cdefg	17.43 ± 0.77 bcde	16.46 ± 0.34 bcde	17.8 ± 0.63 bcd	10.34 ± 1.2 ghijk	6.02 ± 0.33 kl	11.15 ± 0.31 fghij	10.64 ± 0.58 ghij	13.29 ± 0.55 defghi	8.97 ± 0.82 ijk	11.62 ± 0.5 fghij	8.22 ± 0.43 jk	13.21 ± 0.1 efghi	13.63 ± 0.01 defgh	7.91 ± 0.09 jk	7.62 ± 0.06 jk	13.68 ± 0.57 defgh	8.88 ± 0.26 ijk	17.25 ± 1.26 bcde	25.4 ± 2.5 a	18.51 ± 0.37 bc	18.5 ± 1.5 bc	9.31 ± 0.64 hijk	10.3 ± 0.23 ghijk	1.52 ± 0.18 l	19.6 ± 0.74 b	12.91 ± 0.66 efghi	15.39 ± 0.16 bcdef	14 ± 0.76 cdefg	10.35 ± 0.28 ghijk
B_4'-Hydroxycinnamic acid (cis/trans)	12.44 ± 0.19 jklm	7.05 ± 1.41 lm	7.85 ± 0.46 klm	7.3 ± 0.31 lm	6.59 ± 0.35 m	7.08 ± 0.25 lm	40.98 ± 1.74 def	46.44 ± 2.07 bcd	53.35 ± 2.39 bc	43.92 ± 2.62 cde	35.74 ± 0.48 ef	55.85 ± 0.26 b	20.49 ± 1.29 ij	15.98 ± 0.08 ijklm	21.79 ± 0.12 hij	17.45 ± 0.86 ijkl	17.84 ± 0.29 ijk	24.17 ± 0.12 ghi	16.01 ± 0.9 ijklm	23.04 ± 1.82 hi	16.17 ± 0.91 ijklm	23.56 ± 2.49 hi	14.06 ± 3.44 ijklm	21.81 ± 0.61 hij	31.35 ± 1.57 fgh	38.15 ± 0.73 def	34.36 ± 0.08 efg	38.91 ± 4.41 def	56.63 ± 1.85 b	73.76 ± 5.17 a
B_3'-Hydroxycinnamic acid (cis/trans)	5.88 ± 0.31 hi	5.42 ± 1.04 hi	7.37 ± 0.49 hi	7.2 ± 0.18 hi	6.55 ± 0.48 hi	5.52 ± 0.99 hi	19.33 ± 0.35 bcd	17.42 ± 0.29 bcdef	23.44 ± 1.24 ab	18.51 ± 1.45 bcde	19.28 ± 0.45 bcd	24.54 ± 0.54 ab	3.65 ± 0.58 i	4.2 ± 0.14 hi	6.57 ± 0.32 hi	8.23 ± 0.09 fghi	8.38 ± 0.2 fghi	8.87 ± 0.26 fghi	9.84 ± 0.12 efghi	10.27 ± 0.17 defghi	9.75 ± 0.18 efghi	8.99 ± 0.19 fghi	7.21 ± 0.46 hi	10.24 ± 1.63 defghi	7.94 ± 0.22 ghi	21.71 ± 1.55 bc	13.09 ± 2.16 cdefgh	16.73 ± 5.67 bcdefg	32.22 ± 1.6 a	21.42 ± 4.24 bc
B_4-Hydroxy-3-methoxybenzoic acid	1.27 ± 0.05 j	1.31 ± 0.08 j	1.65 ± 0.11 ij	2.05 ± 0.05 hij	1.68 ± 0.15 ij	2.29 ± 0.01 ghij	2.5 ± 0.06 fghij	3.28 ± 0.12 cdefgh	3.94 ± 0.04 abcde	4.58 ± 0.01 abc	4.48 ± 0.23 abc	4.16 ± 0.22 abcde	2.43 ± 0.06 fghij	2.07 ± 0 hij	2.1 ± 0.06 hij	2.23 ± 0.07 hij	3.92 ± 0.09 bcde	2.93 ± 0.02 efghi	2.95 ± 0.6 defghi	4.35 ± 0.14 abcd	2.45 ± 0.39 fghij	4.83 ± 0.08 ab	3.65 ± 0.04 bcdefg	5.33 ± 0.38 a	2.26 ± 0.13 ghij	2.89 ± 0.15 efghi	2.92 ± 0 efghi	3.02 ± 0.27 defghi	3.41 ± 0.65 cdefgh	3.77 ± 0.49 bcdef
B_3',4'-Dihydroxycinnamic acid	0.71 ± 0.11 ef	1.02 ± 0.06 e	n.d.	n.d.	n.d.	n.d.	0.6 ± 0.05 fg	0.58 ± 0.01 fgh	0.49 ± 0.04 fghi	0.45 ± 0.04 fghij	0.35 ± 0.03 ghij	0.32 ± 0.01 ghijk	1.73 ± 0.16 c	2.08 ± 0.06 b	2.32 ± 0.16 b	0.4 ± 0.02 fghij	n.d.	n.d.	1.03 ± 0.12 e	5.38 ± 0.01 a	1.65 ± 0.02 cd	0.2 ± 0.03 ijk	0.17 ± 0.02 ijk	0.18 ± 0.01 ijk	0.24 ± 0.05 hijk	1.38 ± 0.1 d	0.63 ± 0.02 fg	0.14 ± 0.01 jk	0.36 ± 0.01 ghij	0.34 ± 0.02 ghijk
B_Syringaldehyde	n.d.	n.d.	n.d.	n.d.	n.d.	n.d.	n.d.	n.d.	n.d.	n.d.	n.d.	n.d.	1.43 ± 0.04 de	1.49 ± 0.06 de	1.42 ± 0.03 de	1.71 ± 0.03 bcd	1.94 ± 0.19 b	1.94 ± 0.11 b	1.29 ± 0.14 e	1.57 ± 0.06 cde	1.34 ± 0.02 e	1.52 ± 0.05 de	1.85 ± 0.06 bc	2.99 ± 0.05 a	n.d.	n.d.	n.d.	n.d.	n.d.	n.d.
B_4'-Hydroxy-3'-methoxycinnamic acid (cis/trans)	21.14 ± 0.32 j	14.24 ± 1.11 j	16.62 ± 0.54 j	17.79 ± 0.87 j	16.01 ± 0.74 j	16.64 ± 2.93 j	235.97 ± 10.86 cd	273.87 ± 7.71 ab	260.15 ± 0.87 bc	260.21 ± 5.99 bc	253.99 ± 9.77 bcd	264.75 ± 4.22 b	133.93 ± 2.05 ghi	127.31 ± 2.14 hi	131.63 ± 1.32 hi	137.51 ± 1.01 ghi	126.27 ± 6.22 hi	113.74 ± 1.75 i	233.45 ± 3.36 d	293.1 ± 4.4 a	256.38 ± 1.92 bcd	266.28 ± 1.43 b	159.68 ± 3.5 fg	148.27 ± 5.47 gh	143.21 ± 4.74 gh	203.94 ± 2.27 e	181.04 ± 0.4 ef	180.89 ± 1.75 ef	205.98 ± 3.07 e	196.71 ± 14.27 e
B_3'-Hydroxy-4'-methoxycinnamic acid (cis/trans)	8.2 ± 0.69 jk	5.68 ± 0.57 k	7.28 ± 0.11 k	7.18 ± 0.27 k	6.51 ± 0.64 k	5.9 ± 0.35 k	114.73 ± 9.36 abcde	125.58 ± 4.31 abcd	151.53 ± 10.63 a	130.17 ± 0.52 abc	99.95 ± 3.97 abcdefg	98.92 ± 0.14 bcdefg	61.07 ± 1.01 fghi	43.68 ± 0.06 hijk	55.8 ± 1.34 ghijk	72.31 ± 0.79 efghi	57.3 ± 0.48 ghijk	34.63 ± 0.7 ijk	136.76 ± 11.07 abc	150.64 ± 21.07 ab	111.96 ± 20.6 abcdef	99.69 ± 22.67 abcdefg	101.84 ± 17.1 abcdefg	120.36 ± 12.97 abcde	74.44 ± 3.19 defghi	106.4 ± 1.6 abcdefg	90.46 ± 6.88 cdefgh	105.02 ± 2.29 abcdefg	96.31 ± 2.46 cdefg	59.94 ± 1.7 fghij
B_3,5-Dimethoxy-4-hydroxybenzoic acid	n.d.	n.d.	n.d.	n.d.	n.d.	n.d.	1.59 ± 0.03 c	1.45 ± 0.03 c	1.64 ± 0.06 bc	1.92 ± 0.1 a	1.88 ± 0.03 a	2.01 ± 0.05 a	n.d.	n.d.	n.d.	n.d.	n.d.	n.d.	n.d.	n.d.	n.d.	n.d.	n.d.	n.d.	1.09 ± 0.02 d	1.16 ± 0.09 d	1.09 ± 0.01 d	1.16 ± 0.07 d	1.98 ± 0.03 a	1.82 ± 0.07 ab
B_8/5-5'-Diferulic acid	0.96 ± 0.27 b	1.49 ± 0.10 b	2.80 ± 0.05 a	1.75 ± 0.04 b	1.23 ± 0.07 b	1.36 ± 0.38 b	33.46 ± 1.25 c	37.05 ± 2.31 b	40.95 ± 0.99 b	66.61 ± 1.22 a	33.46 ± 1.25 c	31.13 ± 0.95 c	12.37 ± 0.36 bc	11.03 ± 0.20 c	14.73 ± 0.43 b	17.31 ± 0.51 a	14.85 ± 0.19 b	11.89 ± 0.20 c	35.21 ± 1 b	47.17 ± 2.19 a	28.74 ± 2.55 c	31.10 ± 0.87 b	29.36 ± 1.33 c	18.78 ± 1.7 d	7.63 ± 0.17 c	9.78 ± 0.34 b	9.22 ± 0.89 b	9.46 ± 0.69 b	9.3 ± 0.33 b	12.22 ± 1.10 a
B_TriFerulic acid	0.15 ± 0 g	0.11 ± 0 jk	0.13 ± 0 g	n.d.	n.d.	n.d.	2.08 ± 0.03 c	3.07 ± 0.13 a	2.64 ± 0.06 b	1.83 ± 0.08 de	1.11 ± 0.03 fg	0.95 ± 0.04 g	1.29 ± 0.01 e	0.94 ± 0.05 f	1.55 ± 0.12 cd	1.42 ± 0.06 de	0.78 ± 0.02 fg	0.77 ± 0.06 fg	7.74 ± 1.07 b	11.07 ± 0.57 a	7.14 ± 0.39 b	6.81 ± 0.54 b	7.26 ± 0.62 b	7.1 ± 0.29 b	2.52 ± 0.08 a	1.89 ± 0.02 ab	2.84 ± 0.17 a	2.9 ± 0.18 a	1.53 ± 0.13 b	n.d.
B_Cinnamic acid	n.d.	1.06 ± 0 hijk	5.56 ± 0.03 ab	6.78 ± 0.71 a	6.27 ± 0.33 ab	0.59 ± 0.01 ijk	n.d.	0.67 ± 0.05 ijk	3.11 ± 0.11 de	4.07 ± 0.09 cd	5.09 ± 0.09 bc	3.99 ± 0.06 cd	n.d.	0.44 ± 0.02 ijk	1.71 ± 0.01 fghi	2.79 ± 0.01 def	6.11 ± 0.3 ab	2.64 ± 0.08 efg	n.d.	0.12 ± 0 jk	0.61 ± 0.1 ijk	2.33 ± 0.13 efgh	1.18 ± 0.1 hijk	1.27 ± 0.28 hijk	n.d.	0.22 ± 0.05 jk	0.56 ± 0.14 ijk	1 ± 0.6 ijk	2.91 ± 0.57 def	1.36 ± 0.07 ghij
Total Bound phenolic acids	74.5 ± 1.62 j	66.2 ± 6.15 j	77.95 ± 0.66 j	79.25 ± 1.3 j	67.37 ± 0.58 j	56.79 ± 5.4 j	469.44 ± 22.85 cd	528.88 ± 17 abc	564.21 ± 15.24 ab	549.37 ± 31.65 ab	479.4 ± 15.47 cd	505.87 ± 5.01 bc	256.69 ± 2.73 i	230.52 ± 2.14 i	254.85 ± 0.72 i	277.74 ± 0.55 hi	262.45 ± 6.75 i	221.62 ± 2.73 i	468.93 ± 5.5 cd	580.13 ± 21.11 a	461.94 ± 17.26 cd	471.7 ± 16.71 cd	342.44 ± 24.25 gh	355.54 ± 4.3 fg	275.03 ± 10.26 hi	412.19 ± 5.06 def	354.88 ± 9.3 fg	377.81 ± 11.78 efg	433.92 ± 4.23 de	392.99 ± 13.18 efg
Hydroxyphenylpropanoic acid	0.85 ± 0 l	1.01 ± 0 l	4.83 ± 0 hijkl	7.56 ± 0 hi	16.45 ± 0 g	19.73 ± 0 g	2.15 ± 0.06 jkl	0.93 ± 0.01 l	3.38 ± 0.17 ijkl	6.3 ± 0.10 hij	60.96 ± 0.83 f	154.94 ± 2.78 a	1.24 ± 0.02 kl	1.03 ± 0.03 l	2.63 ± 0.02 jkl	7.57 ± 0.25 hi	77.56 ± 3.07 e	106.35 ± 1.13 c	1.18 ± 0.07 kl	0.89 ± 0.07 l	2.88 ± 0.04 ijkl	5.83 ± 0.68 hijk	16.74 ± 0.64 g	120.66 ± 2.53 b	0.96 ± 0.07 l	0.85 ± 0.03 l	1.3 ± 0.03 kl	4.88 ± 0.28 hijkl	9.22 ± 0.24 h	88.21 ± 1.5 d
Hydroxyphenylvaleric acid	n.d.	n.d.	n.d.	n.d.	n.d.	n.d.	n.d.	n.d.	n.d.	n.d.	1.22 ± 0.08 c	1.11 ± 0.04 cd	n.d.	n.d.	n.d.	n.d.	n.d.	n.d.	1.13 ± 0.1 cd	1.91 ± 0.01 a	0.72 ± 0.05 e	n.d.	0.75 ± 0.01 e	1.85 ± 0.15 ab	n.d.	n.d.	n.d.	n.d.	0.96 ± 0.04 d	1.66 ± 0.03 b
3-(4'-Hydroxy-3'-methoxyphenyl)propanoic acid	0.74 ± 0 i	1.1 ± 0 i	1.15 ± 0 i	0.65 ± 0 i	0.51 ± 0 i	0.49 ± 0 i	1.46 ± 0.03 i	13.55 ± 0.74 ef	28.94 ± 0.4 bc	31.80 ± 0.91 b	29.05 ± 1.10 bc	2.74 ± 0.05 hi	1.5 ± 0.10 i	9.82 ± 0.42 g	18.9 ± 0.77 d	22.12 ± 1.53 d	10.99 ± 0.3 fg	1.54 ± 0.04 i	0.99 ± 0.05 i	5.27 ± 0.07 h	10.75 ± 0.59 fg	14.69 ± 0.17 e	27.48 ± 0.32 c	2.47 ± 0.01 hi	0.81 ± 0.13 i	5.12 ± 0.43 h	12.94 ± 1.07 efg	20.33 ± 0.55 d	46.2 ± 4.5 a	3.57 ± 0.18 hi
3,5-Dimethoxy-4-hydroxycinnamic acid reduced form	n.d.	n.d.	n.d.	n.d.	n.d.	n.d.	n.d.	n.d.	n.d.	n.d.	n.d.	n.d.	n.d.	n.d.	n.d.	n.d.	n.d.	n.d.	36.35 ± 2.02 c	60.04 ± 6.03 b	79.75 ± 3.67 a	72.10 ± 3.90 a	36.56 ± 2.42 c	77.43 ± 5.66 a	n.d.	n.d.	n.d.	n.d.	n.d.	n.d.
Phenylpropanoic acid	4.44 ± 0 e	3.14 ± 0 fghi	6.52 ± 0 d	7.44 ± 0 c	21.37 ± 0 b	37.20 ± 0 a	3.1 ± 0.02 fghi	3.32 ± 0.05 fg	3.16 ± 0.28 fghi	3.13 ± 0.01 fghi	4.4 ± 0.13 f	4.62 ± 0.09 e	3.19 ± 0.11 fghi	3.23 ± 0.2 fgh	3.26 ± 0.1 fg	3.33 ± 0.07 fg	4.7 ± 0.11 e	4.97 ± 0.12 e	2.38 ± 0.04 fghi	3.01 ± 0.05 ghi	2.64 ± 0.06 ij	2.66 ± 0.04 hij	3.2 ± 0.17 fghi	3.59 ± 0.12 f	1.86 ± 0.02 k	2.2 ± 0.15 jk	2.63 ± 0.06 ij	2.39 ± 0.13 jk	2.64 ± 0.13 ij	3.06 ± 0.09 fghi
4'-Hydroxyphenylacetic acid	0.90 ± 0 jkl	2.12 ± 0 ghi	12.32 ± 0 c	9.15 ± 0 d	0.71 ± 0 kl	4.64 ± 0 e	1.17 ± 0.03 ijkl	1.96 ± 0.06 hij	3.25 ± 0.15 fg	3.62 ± 0.02 ef	30.00 ± 0.65 b	0.46 ± 0.05 kl	0.84 ± 0 jkl	1.56 ± 0.02 ijk	2.82 ± 0.03 fgh	3.08 ± 0.16 fgh	94.48 ± 4.72 a	0.72 ± 0.06 kl	0.61 ± 0.06 kl	1.12 ± 0.15 ijkl	1.01 ± 0.07 ijkl	1.46 ± 0.06 ijk	8.6 ± 0.72 d	0.24 ± 0.01 l	0.46 ± 0.01 lk	0.89 ± 0.04 jkl	1.15 ± 0.04 ijkl	1.22 ± 0.14 ijkl	3.19 ± 0.67 fg	0.18 ± 0.01 l
3'-Hydroxyphenylacetic acid	0.22 ± 0 ijklm	n.d.	n.d.	n.d.	n.d.	1.38 ± 0 a	0.38 ± 0.02 e	0.35 ± 0.02 efg	0.30 ± 0.02 efghi	0.32 ± 0.03 efghi	0.2 ± 0 jklm	0.74 ± 0.02 b	0.48 ± 0.02 d	0.37 ± 0.02 ef	0.33 ± 0.02 efgh	0.27 ± 0.02 fghijk	n.d.	0.67 ± 0.02 bc	0.26 ± 0.01 ghijkl	0.29 ± 0.01 efghij	0.26 ± 0.04 ghijkl	0.31 ± 0.01 efghi	0.24 ± 0 hijkl	0.68 ± 0.02 bc	0.18 ± 0.01 klm	0.27 ± 0 fghij	0.32 ± 0.02 efgh	0.14 ± 0 m	0.17 ± 0 lm	0.61 ± 0.03 c
2'-Hydroxyphenylacetic acid	n.d.	n.d.	n.d.	n.d.	n.d.	12.45 ± 0 a	0.06 ± 0 d	0.05 ± 0 d	0.06 ± 0.01 d	0.08 ± 0 d	n.d.	2.33 ± 0.10 c	n.d.	0.09 ± 0 d	0.08 ± 0 d	0.06 ± 0.01 d	n.d.	2.53 ± 0.11 bc	0.14 ± 0 d	0.16 ± 0 d	0.19 ± 0.01 d	0.18 ± 0.01 d	0.18 ± 0.02 d	2.86 ± 0.30 b	n.d.	0.06 ± 0 d	0.03 ± 0 d	0.08 ± 0.01 d	n.d.	2.82 ± 0.07 b
Total metabolites derived from colonic phenolics	7.15 ± 0 lm	7.38 ± 0 lm	24.84 ± 0 ijk	24.79 ± 0 ijk	39.04 ± 0 ghi	75.89 ± 0 f	8.65 ± 0.19 lm	20.47 ± 0.85 jkl	39.56 ± 0.19 ghi	45.64 ± 0.92 g	126.12 ± 0.62 d	167.24 ± 2.84 c	7.41 ± 0.08 lm	16.11 ± 0.31 jklm	28.02 ± 0.78 ij	36.42 ± 1.38 ghi	187.72 ± 8.19 b	116.79 ± 1.17 d	43.19 ± 2.17 gh	73.42 ± 5.93 f	98.96 ± 4.14 e	98.20 ± 4.82 e	94.43 ± 3.53 e	210.66 ± 8.68 a	4.74 ± 0.22 m	10.07 ± 0.61 klm	18.99 ± 1.16 jklm	29.68 ± 0.29 hij	63.14 ± 4.88 f	100.71 ± 1.56 e
Values are expressed as mean ± SD. For each compound, statistical differences were evaluated by two-way ANOVA considering product and fermentation time, including their interaction, followed by Tukey’s HSD post hoc test (p < 0.05). Different lowercase letters denote significant differences among product × time combinations within each variable. Compounds with the prefix B- correspond to phenolic …

## Sheet: Supplementary_Table_5Genus >0.5
Supplementary Table 5. Statistical analysis of genus-level taxa differences between the digestion control and four barley extrudates across fermentation times.
Condition	Time	Escherichia-Shigella	Streptococcus	Megasphaera	Blautia	Bifidobacterium	Collinsella	Acidaminococcus	Holdemanella	Erysipelotrichaceae UCG-003	Clostridium	Dialister	Gemmiger	Romboutsia	Anaerobutyricum	Faecalibacterium	Coprococcus	Agathobacter	Dorea	Akkermansia	Paeniclostridium	Fusicatenibacter	Mediterraneibacter	Phascolarctobacterium	Catenibacterium	Anaerostipes	Bacteroides	NK4A214 group	UCG-002	Parabacteroides	Christensenellaceae R-7 group	Senegalimassilia	CAG-352	[Eubacterium] eligens group	Lachnospiraceae NK4A136 group	[Ruminococcus] gauvreauii group	UCG-005	Tractidigestivibacter	Slackia	Roseburia	Monoglobus	Acutalibacter	Alistipes	Ruminococcus	UCG-003	Marvinbryantia	Sutterella	Klebsiella
Control	0h	0.18 ± 0.00 i	1.12 ± 0.00 g	0.37 ± 0.00 e	12.72 ± 0.00 a	9.5 ± 0.00 abcd	3.92 ± 0.00 bcdef	0.00 ± 0.00 c	4.18 ± 0.00 bcd	1.24 ± 0.00 def	0.7 ± 0.00 c	1.82 ± 0.00 b	2.87 ± 0.00 abc	0.82 ± 0.00 abcd	2.49 ± 0.00 ab	6.58 ± 0.00 a	2.59 ± 0.00 a	1.43 ± 0.00 a	1.35 ± 0.00 abcd	0.38 ± 0.00 defg	0.00 ± 0.00 a	1.39 ± 0.00 a	1.17 ± 0.00 abcd	0.65 ± 0.00 abcde	0.36 ± 0.00 bcde	0.66 ± 0.00 abc	1.85 ± 0.00 abcde	0.62 ± 0.00 abcdef	1.08 ± 0.00 abcd	0.42 ± 0.00 abcd	2.32 ± 0.00 abcd	0.45 ± 0.00 ab	0.52 ± 0.00 a	0.51 ± 0.00 a	0.77 ± 0.00 a	0.32 ± 0.00 cde	0.84 ± 0.00 ab	0.04 ± 0.00 b	0.25 ± 0.00 abcdef	0.54 ± 0.00 abcd	0.28 ± 0.00 efghi	0.62 ± 0.00 a	0.36 ± 0.00 abc	0.61 ± 0.00 a	0.13 ± 0.00 bc	0.5 ± 0.00 ab	0.00 ± 0.00 b	0.00 ± 0.00 d
Annapurna®	0h	0.13 ± 0.09 i	1.64 ± 0.17 g	0.13 ± 0.08 e	12.19 ± 1.8 a	10.16 ± 0.77 abcd	6.54 ± 0.71 ab	0.00 ± 0.00 c	7.31 ± 0.06 a	1.81 ± 0.18 bcd	0.73 ± 0.16 c	2.23 ± 0.06 a	2.72 ± 0.07 c	0.96 ± 0.18 abc	2.39 ± 0.29 ab	5.41 ± 0.8 abcd	2.28 ± 0.19 ab	1.15 ± 0.01 ab	1.11 ± 0.15 bcde	1.25 ± 0.43 bc	0.00 ± 0.00 a	0.96 ± 0.06 bcd	1.34 ± 0.23 abc	0.76 ± 0.1 ab	0.49 ± 0.08 bcde	0.52 ± 0.37 abc	2.63 ± 0.57 ab	0.51 ± 0.09 bcdefgh	0.81 ± 0.18 abcde	0.43 ± 0.15 abcd	1.96 ± 0.14 cdef	0.4 ± 0.18 ab	0.26 ± 0.04 cdefg	0.09 ± 0.13 a	0.66 ± 0.16 ab	0.61 ± 0.08 ab	0.22 ± 0.09 cdef	0.14 ± 0.04 b	0.45 ± 0.05 abc	0.51 ± 0.17 abcde	0.54 ± 0.02 ab	0.57 ± 0.03 ab	0.35 ± 0.09 abc	0.39 ± 0.05 abc	0.05 ± 0.05 cde	0.26 ± 0.16 abcdef	0.00 ± 0.00 b	0.00 ± 0.00 d
DHL-151340	0h	0.2 ± 0.01 i	1.68 ± 0.21 g	0.27 ± 0.01 e	12.17 ± 0.61 a	7.92 ± 2.58 cde	5.19 ± 0.35 b	0.00 ± 0.00 c	7.49 ± 0.82 a	2.19 ± 0.33 abc	0.69 ± 0.07 c	2 ± 0.01 ab	2.86 ± 0.13 bc	0.89 ± 0.03 abc	2.17 ± 0.05 abc	6.05 ± 0.46 ab	2.42 ± 0.17 a	1.32 ± 0.15 a	1.28 ± 0.43 bcd	0.95 ± 0.04 cd	0.00 ± 0.00 a	1.1 ± 0.07 abc	1.3 ± 0.09 abc	0.71 ± 0.02 abcd	0.44 ± 0.06 bcde	0.78 ± 0.03 a	2.75 ± 0.13 a	0.76 ± 0.08 abc	1.03 ± 0.21 abcd	0.57 ± 0.19 abcd	2.31 ± 0.07 abcd	0.5 ± 0.05 ab	0.32 ± 0.05 cde	0.43 ± 0.08 a	0.68 ± 0.14 a	0.71 ± 0.04 a	0.48 ± 0.07 bcd	0.1 ± 0.07 b	0.38 ± 0.03 abcd	0.74 ± 0.06 a	0.45 ± 0.01 abcde	0.52 ± 0.04 abc	0.38 ± 0.07 abc	0.51 ± 0.05 ab	0.07 ± 0.01 bcde	0.37 ± 0.11 abcde	0.00 ± 0.00 b	0.00 ± 0.00 d
Hilose®	0h	0.19 ± 0.02 i	1.78 ± 0.07 g	0.27 ± 0.01 e	12.28 ± 0.1 a	11.65 ± 0.21 abc	4.2 ± 1.72 bcd	0.00 ± 0.00 c	6.72 ± 0.19 a	2.01 ± 0.07 bcd	0.69 ± 0.1 c	2.15 ± 0.1 a	3.07 ± 0.04 abc	0.99 ± 0.06 abc	1.83 ± 0.4 bcd	5.28 ± 0.19 abcd	1.92 ± 0.35 abc	1.14 ± 0.01 abc	1.49 ± 0.32 abcd	1.29 ± 0.02 bc	0.00 ± 0.00 a	0.98 ± 0.02 bcd	0.79 ± 0.5 bcdef	0.73 ± 0.03 abc	0.66 ± 0.03 abcd	0.79 ± 0.13 a	1.99 ± 0.07 abcd	0.63 ± 0.03 abcde	0.91 ± 0.00 abcd	0.59 ± 0.04 abcd	2.08 ± 0.02 bcde	0.68 ± 0.01 ab	0.34 ± 0.00 cde	0.37 ± 0.00 a	0.5 ± 0.07 abcd	0.68 ± 0.05 a	0.25 ± 0.06 cdef	0.19 ± 0.03 ab	0.52 ± 0.00 a	0.66 ± 0.07 ab	0.57 ± 0.03 a	0.39 ± 0.03 cdef	0.24 ± 0.03 bcde	0.49 ± 0.14 ab	0.02 ± 0.02 cde	0.32 ± 0.08 abcde	0.00 ± 0.00 b	0.00 ± 0.00 d
SBExpCE	0h	0.19 ± 0.02 i	1.57 ± 0.41 g	0.19 ± 0.14 e	11.61 ± 1.02 a	9.23 ± 0.97 bcd	4.78 ± 0.64 bc	0.00 ± 0.00 c	6.99 ± 1.16 a	1.92 ± 0.15 bcd	0.64 ± 0.07 c	2.06 ± 0.1 ab	2.62 ± 0.12 c	0.59 ± 0.44 cd	2.23 ± 0.22 abc	5.97 ± 1.11 abc	1.9 ± 0.37 abc	1.32 ± 0.03 a	1.28 ± 0.4 bcd	0.99 ± 0.05 cd	0.00 ± 0.00 a	1.11 ± 0.04 abc	1.44 ± 0.13 a	0.74 ± 0.02 abc	0.51 ± 0.02 bcde	0.77 ± 0.13 a	2.64 ± 0.3 ab	0.45 ± 0.09 cdefgh	1.21 ± 0.34 abc	0.55 ± 0.2 abcd	1.97 ± 0.23 cdef	0.4 ± 0.22 ab	0.39 ± 0.04 abc	0.31 ± 0.29 a	0.55 ± 0.22 abc	0.64 ± 0.12 a	0.44 ± 0.15 bcde	0.07 ± 0.02 b	0.29 ± 0.04 abcde	0.65 ± 0.23 ab	0.41 ± 0.05 bcde	0.4 ± 0.09 bcde	0.6 ± 0.21 a	0.55 ± 0.24 a	0.1 ± 0.04 bcd	0.4 ± 0.13 abcd	0.00 ± 0.00 b	0.00 ± 0.00 d
Control	2h	1.19 ± 0.00 i	1.74 ± 0.00 g	0.35 ± 0.00 e	13.74 ± 0.00 a	10.33 ± 0.00 abcd	4.02 ± 0.00 bcde	0.00 ± 0.00 c	3.41 ± 0.00 cde	1.01 ± 0.00 efg	0.88 ± 0.00 c	1.45 ± 0.00 cd	3.26 ± 0.00 abc	1.03 ± 0.00 abc	2.53 ± 0.00 ab	4.47 ± 0.00 bcde	2 ± 0.00 ab	1.32 ± 0.00 a	2.08 ± 0.00 ab	0.73 ± 0.00 cdefg	0.00 ± 0.00 a	1.27 ± 0.00 ab	1.06 ± 0.00 abcde	0.54 ± 0.00 bcdefg	0.41 ± 0.00 bcde	0.59 ± 0.00 abc	1.51 ± 0.00 bcdef	0.87 ± 0.00 ab	1.39 ± 0.00 ab	0.55 ± 0.00 abcd	2.81 ± 0.00 abc	0.59 ± 0.00 ab	0.54 ± 0.00 a	0.00 ± 0.00 a	0.65 ± 0.00 abc	0.33 ± 0.00 bcde	0.96 ± 0.00 a	0.05 ± 0.00 b	0.28 ± 0.00 abcde	0.65 ± 0.00 ab	0.28 ± 0.00 defgh	0.63 ± 0.00 a	0.42 ± 0.00 abc	0.61 ± 0.00 a	0.16 ± 0.00 b	0.38 ± 0.00 abcde	0.00 ± 0.00 b	0.00 ± 0.00 d
Annapurna®	2h	0.18 ± 0.26 i	1.93 ± 0.58 g	0.16 ± 0.01 e	12.59 ± 0.87 a	12.85 ± 0.72 ab	8.02 ± 0.41 a	0.00 ± 0.00 c	5.72 ± 0.5 abc	1.81 ± 0.1 bcd	0.98 ± 0.09 c	1.3 ± 0.1 cd	3.52 ± 0.11 ab	1.3 ± 0.12 a	2.73 ± 0.1 a	3.02 ± 0.08 efg	1.98 ± 0.06 ab	0.89 ± 0.02 bcd	1.08 ± 0.07 bcdef	2.58 ± 0.43 a	0.00 ± 0.00 a	0.79 ± 0.06 def	0.81 ± 0.11 abcdef	0.51 ± 0.1 bcdefg	0.63 ± 0.02 bcd	0.43 ± 0.3 abc	1.42 ± 0.1 cdef	0.72 ± 0.22 abc	0.81 ± 0.02 abcde	0.58 ± 0.02 abcd	2.77 ± 0.36 abc	0.94 ± 0.01 a	0.23 ± 0.02 efg	0.15 ± 0.11 a	0.31 ± 0.1 abcde	0.72 ± 0.04 a	0.28 ± 0.03 cdef	0.19 ± 0.03 ab	0.49 ± 0.07 a	0.41 ± 0.12 abcdef	0.51 ± 0.05 ab	0.49 ± 0.06 abc	0.2 ± 0.06 cde	0.22 ± 0.1 abc	0.09 ± 0.01 bcde	0.43 ± 0.12 abc	0.00 ± 0.00 b	0.00 ± 0.00 d
DHL-151340	2h	0.24 ± 0.33 i	2.19 ± 0.32 g	0.12 ± 0.08 e	11.5 ± 3.01 a	13.76 ± 0.31 a	6.48 ± 0.05 ab	0.00 ± 0.00 c	6.51 ± 0.37 ab	2.69 ± 0.06 a	0.84 ± 0.2 c	1.19 ± 0.06 d	2.83 ± 0.13 bc	1.28 ± 0.06 a	2.79 ± 0.18 a	3.13 ± 0.12 efg	2.08 ± 0.12 ab	1.26 ± 0.11 a	2.23 ± 0.06 a	0.66 ± 0.06 defg	0.00 ± 0.00 a	0.86 ± 0.03 cde	1.39 ± 0.09 ab	0.56 ± 0.09 bcdef	0.44 ± 0.04 bcde	0.66 ± 0.49 ab	2.05 ± 0.28 abc	0.61 ± 0.21 abcdef	0.8 ± 0.19 bcdef	0.62 ± 0.05 abc	2.49 ± 0.15 abcd	0.68 ± 0.01 ab	0.3 ± 0.02 cdef	0.12 ± 0.17 a	0.58 ± 0.06 abc	0.76 ± 0.07 a	0.3 ± 0.08 cdef	0.07 ± 0.05 b	0.45 ± 0.05 abc	0.12 ± 0.15 def	0.48 ± 0.03 abc	0.46 ± 0.08 abc	0.22 ± 0.02 bcde	0.26 ± 0.19 abc	0.03 ± 0.02 cde	0.4 ± 0.13 abcd	0.00 ± 0.00 b	0.00 ± 0.00 d
Hilose®	2h	0.3 ± 0.06 i	1.78 ± 0.03 g	0.15 ± 0.11 e	12.9 ± 0.33 a	10.95 ± 1.38 abc	5.95 ± 1.29 ab	0.00 ± 0.00 c	5.72 ± 0.66 abc	1.6 ± 0.09 cde	0.79 ± 0.07 c	1.25 ± 0.06 d	3.64 ± 0.19 a	1.22 ± 0.07 ab	2.62 ± 0.08 a	4.22 ± 0.63 def	2.09 ± 0.08 ab	1.22 ± 0.07 a	1.81 ± 0.36 abc	0.91 ± 0.1 cde	0.00 ± 0.00 a	0.91 ± 0.1 cd	1.28 ± 0.13 abc	0.39 ± 0.03 cdefgh	0.44 ± 0.32 bcde	0.85 ± 0.18 a	1.28 ± 0.17 cdefg	0.87 ± 0.03 a	1.44 ± 0.01 a	0.51 ± 0.23 abcd	3.18 ± 0.28 a	0.87 ± 0.1 ab	0.49 ± 0.08 ab	0.37 ± 0.11 a	0.64 ± 0.23 abc	0.76 ± 0.01 a	0.51 ± 0.19 bc	0.11 ± 0.12 b	0.46 ± 0.2 ab	0.49 ± 0.11 abcde	0.45 ± 0.01 abcd	0.43 ± 0.04 abcd	0.32 ± 0.11 abcd	0.3 ± 0.12 abc	0.11 ± 0.03 bc	0.43 ± 0.16 abc	0.00 ± 0.00 b	0.00 ± 0.00 d
SBExpCE	2h	0.1 ± 0.14 i	1.59 ± 0.45 g	0.23 ± 0.07 e	11.27 ± 1.61 a	11.13 ± 0.69 abc	5.36 ± 0.76 b	0.00 ± 0.00 c	6.55 ± 1.43 ab	2.47 ± 0.3 ab	0.57 ± 0.09 c	1.49 ± 0.15 c	3.38 ± 0.13 abc	0.84 ± 0.05 abcd	2.19 ± 0.31 abc	4.44 ± 0.97 cde	1.97 ± 0.1 ab	1.14 ± 0.04 abc	1.33 ± 0.42 abcd	1.6 ± 0.15 b	0.00 ± 0.00 a	0.93 ± 0.13 bcd	1.3 ± 0.04 abc	0.53 ± 0.07 bcdefg	0.34 ± 0.02 cde	0.63 ± 0.06 abc	2.16 ± 0.22 abc	0.75 ± 0.04 abc	1.38 ± 0.37 ab	0.76 ± 0.08 ab	2.91 ± 0.72 ab	0.67 ± 0.32 ab	0.38 ± 0.08 abcd	0.46 ± 0.11 a	0.6 ± 0.14 abc	0.63 ± 0.06 a	0.53 ± 0.18 bc	0.07 ± 0.07 b	0.46 ± 0.03 ab	0.58 ± 0.28 abc	0.39 ± 0.07 bcdef	0.47 ± 0.06 abc	0.51 ± 0.15 ab	0.37 ± 0.12 abc	0.08 ± 0.07 bcde	0.51 ± 0.04 a	0.00 ± 0.00 b	0.00 ± 0.00 d
Control	6h	17.16 ± 0.00 h	2.02 ± 0.00 g	0.2 ± 0.00 e	10.39 ± 0.00 ab	9.56 ± 0.00 abcd	4.34 ± 0.00 bcd	0.00 ± 0.00 c	2.45 ± 0.00 defg	0.81 ± 0.00 efgh	1.18 ± 0.00 c	0.6 ± 0.00 e	2.71 ± 0.00 c	0.95 ± 0.00 abc	2.19 ± 0.00 abc	2.55 ± 0.00 fgh	1.68 ± 0.00 abcde	0.82 ± 0.00 cde	1.96 ± 0.00 abc	0.83 ± 0.00 cdef	0.00 ± 0.00 a	0.69 ± 0.00 defg	0.83 ± 0.00 abcdef	0.42 ± 0.00 bcdefgh	0.33 ± 0.00 cde	0.00 ± 0.00 c	2.2 ± 0.00 abc	0.7 ± 0.00 abcd	1.34 ± 0.00 ab	0.83 ± 0.00 ab	2.81 ± 0.00 abc	0.57 ± 0.00 ab	0.42 ± 0.00 abc	0.38 ± 0.00 a	0.36 ± 0.00 abcde	0.46 ± 0.00 abc	0.61 ± 0.00 abc	0.06 ± 0.00 b	0.34 ± 0.00 abcde	0.55 ± 0.00 abcd	0.33 ± 0.00 cdefg	0.4 ± 0.00 bcdef	0.23 ± 0.00 bcde	0.52 ± 0.00 ab	0.00 ± 0.00 e	0.48 ± 0.00 abc	0.00 ± 0.00 b	0.00 ± 0.00 d
Annapurna®	6h	37.36 ± 1.3 abc	23.01 ± 1.5 bc	0.03 ± 0.04 e	5.5 ± 0.45 bcde	3.89 ± 0.45 ef	1.92 ± 0.35 defg	0.00 ± 0.00 c	1.42 ± 0.7 efg	0.68 ± 0.04 fghi	0.54 ± 0.1 c	0.07 ± 0.05 g	1.12 ± 0.38 defg	0.5 ± 0.1 cd	1.24 ± 0.07 def	1.01 ± 0.12 hijk	0.88 ± 0.14 defghi	0.39 ± 0.14 fghij	0.14 ± 0.2 g	0.43 ± 0.03 defg	0.00 ± 0.00	0.6 ± 0.05 efgh	0.24 ± 0.18 fgh	0.18 ± 0.02 gh	0.12 ± 0.09 de	0.43 ± 0.05 abc	0.79 ± 0.18 efgh	0.24 ± 0.11 ghijk	0.5 ± 0.19 defg	0.44 ± 0.07 abcd	1.15 ± 0.29 fghi	0.27 ± 0.03 ab	0.16 ± 0.05 fgh	0.06 ± 0.08 a	0.26 ± 0.05 cde	0.33 ± 0.02 cde	0.2 ± 0.07 cdef	0.02 ± 0.02 b	0.08 ± 0.06 ef	0.15 ± 0.03 def	0.19 ± 0.02 ghijk	0.23 ± 0.02 efg	0.04 ± 0.03 de	0.09 ± 0.01 bc	0.05 ± 0.01 bcde	0.13 ± 0.05 cdef	0.00 ± 0.00 b	0.01 ± 0.01 d
DHL-151340	6h	40.35 ± 3.95 a	15.83 ± 1.68 ef	0.05 ± 0.08 e	5.97 ± 0.3 bcd	2.54 ± 0.43 f	0.97 ± 0.68 efg	0.00 ± 0.00 c	2.32 ± 0.11 defg	0.69 ± 0.52 fghi	0.36 ± 0.09 c	0.2 ± 0.02 fg	1.22 ± 0.46 def	0.57 ± 0.06 cd	1.34 ± 0.07 de	1.94 ± 0.11 ghi	0.46 ± 0.34 fghij	0.73 ± 0.03 de	0.49 ± 0.05 defg	0.33 ± 0.08 efg	0.00 ± 0.00	0.29 ± 0.21 ijklm	0.78 ± 0.05 bcdefg	0.41 ± 0.01 bcdefgh	0.15 ± 0.01 de	0.44 ± 0.03 abc	1.37 ± 0.83 cdef	0.24 ± 0.1 ghijk	0.44 ± 0.12 defg	0.57 ± 0.29 abcd	1.11 ± 0.18 fghi	0.18 ± 0.14 b	0.25 ± 0.03 cdefg	0.11 ± 0.16 a	0.3 ± 0.07 abcde	0.21 ± 0.15 cdef	0.15 ± 0.07 def	0.00 ± 0.00 b	0.07 ± 0.06 ef	0.25 ± 0.08 bcdef	0.16 ± 0.12 ghijklmn	0.22 ± 0.06 fg	0.11 ± 0.08 cde	0.24 ± 0.19 abc	0.04 ± 0.04 cde	0.16 ± 0.05 bcdef	0.00 ± 0.00 b	0.00 ± 0.00 d
Hilose®	6h	34.13 ± 0.91 bcde	22.22 ± 0.69 cd	0.06 ± 0.04 e	4.16 ± 1.87 cdefg	3.98 ± 0.95 ef	2.26 ± 0.45 cdefg	0.00 ± 0.00 c	1.58 ± 0.39 efg	0.8 ± 0.06 fgh	0.32 ± 0.08 c	0.1 ± 0.03 g	1.45 ± 0.16 de	0.44 ± 0.31 cd	0.6 ± 0.54 fg	1.81 ± 0.08 ghij	0.9 ± 0.11 defgh	0.67 ± 0.04 def	0.96 ± 0.35 cdefg	0.43 ± 0.09 defg	0.00 ± 0.00	0.54 ± 0.09 fghi	0.73 ± 0.07 cdefgh	0.13 ± 0.1 gh	0.16 ± 0.11 de	0.28 ± 0.2 abc	0.94 ± 0.03 efgh	0.3 ± 0.03 fghijk	0.44 ± 0.27 defg	0.46 ± 0.25 abcd	1.07 ± 0.19 ghij	0.25 ± 0.1 ab	0.27 ± 0.00 cdef	0.08 ± 0.11 a	0.21 ± 0.15 cde	0.29 ± 0.02 cde	0.29 ± 0.04 cdef	0.01 ± 0.02 b	0.14 ± 0.03 def	0.21 ± 0.1 cdef	0.19 ± 0.02 ghijkl	0.13 ± 0.04 gh	0.1 ± 0.05 cde	0.14 ± 0.13 abc	0.07 ± 0.00 bcde	0.14 ± 0.02 bcdef	0.00 ± 0.00 b	0.02 ± 0.01 d
SBExpCE	6h	40.77 ± 2.26 a	10.55 ± 1.1 f	0.02 ± 0.03 e	6.97 ± 0.29 bc	4.43 ± 0.52 ef	2.19 ± 0.55 cdefg	0.00 ± 0.00 c	2.58 ± 0.51 def	1.49 ± 0.07 de	0.37 ± 0.02 c	0.12 ± 0.08 g	1.73 ± 0.06 d	0.68 ± 0.11 bcd	1.6 ± 0.1 cd	1.39 ± 0.25 hijk	0.76 ± 0.33 efghij	0.59 ± 0.12 efgh	1.22 ± 0.31 bcde	0.52 ± 0.07 defg	0.00 ± 0.00	0.5 ± 0.02 ghij	0.83 ± 0.02 abcdef	0.36 ± 0.02 defgh	0.09 ± 0.06 de	0.55 ± 0.02 abc	0.59 ± 0.06 fgh	0.32 ± 0.04 efghij	0.23 ± 0.23 efg	0.33 ± 0.11 bcd	1.3 ± 0.12 efgh	0.6 ± 0.22 ab	0.28 ± 0.04 cdef	0.26 ± 0.06 a	0.18 ± 0.09 cde	0.35 ± 0.03 bcd	0.12 ± 0.13 ef	0.03 ± 0.03 b	0.29 ± 0.1 abcde	0.12 ± 0.06 def	0.25 ± 0.04 fghi	0.12 ± 0.07 gh	0.09 ± 0.06 cde	0.33 ± 0.18 abc	0.01 ± 0.01 de	0.15 ± 0.03 bcdef	0.00 ± 0.00 b	0.01 ± 0.01 d
Control	10h	39.7 ± 0.00 ab	1.16 ± 0.00 g	0.14 ± 0.00 e	5.8 ± 0.00 bcde	5.49 ± 0.00 def	0.71 ± 0.00 g	0.00 ± 0.00 c	1.31 ± 0.00 efg	0.00 ± 0.00 i	5.78 ± 0.00 b	0.03 ± 0.00 g	1.36 ± 0.00 def	0.62 ± 0.00 cd	1.23 ± 0.00 def	1.16 ± 0.00 hijk	0.76 ± 0.00 efghij	0.49 ± 0.00 efghi	0.53 ± 0.00 defg	0.44 ± 0.00 defg	6.45 ± 0.00	0.33 ± 0.00 hijklm	0.5 ± 0.00 defgh	0.29 ± 0.00 defgh	0.25 ± 0.00 de	0.47 ± 0.00 abc	1.46 ± 0.00 bcdef	0.55 ± 0.00 abcdefg	0.73 ± 0.00 bcdefg	0.75 ± 0.00 abc	1.56 ± 0.00 defg	0.13 ± 0.00 b	0.25 ± 0.00 cdefg	0.25 ± 0.00 a	0.14 ± 0.00 de	0.2 ± 0.00 cdef	0.48 ± 0.00 bcde	0.00 ± 0.00 b	0.24 ± 0.00 abcdef	0.11 ± 0.00 def	0.15 ± 0.00 hijklmno	0.23 ± 0.00 defg	0.2 ± 0.00 bcde	0.3 ± 0.00 abc	0.06 ± 0.00 bcde	0.24 ± 0.00 abcdef	0.00 ± 0.00 b	0.51 ± 0.00 a
Annapurna®	10h	34.52 ± 1.11 bcde	29.36 ± 0.71 a	0.35 ± 0.07 e	4.82 ± 0.38 cdef	4.6 ± 0.94 ef	1.3 ± 0.17 defg	0.01 ± 0.01 c	1.08 ± 0.08 efg	0.44 ± 0.08 ghi	0.65 ± 0.25 c	0.11 ± 0.00 g	1.29 ± 0.02 def	0.46 ± 0.01 cd	0.35 ± 0.12 g	0.86 ± 0.03 hijk	0.74 ± 0.14 efghij	0.38 ± 0.09 ghij	0.43 ± 0.06 defg	0.66 ± 0.15 defg	0.00 ± 0.00 a	0.51 ± 0.09 fghi	0.53 ± 0.07 defgh	0.21 ± 0.02 fgh	0.00 ± 0.00 e	0.05 ± 0.04 bc	1.05 ± 0.34 cdefgh	0.27 ± 0.05 fghijk	0.49 ± 0.05 defg	0.43 ± 0.05 abcd	1.15 ± 0.03 fghi	0.24 ± 0.05 ab	0.12 ± 0.01 ghi	0.27 ± 0.02 a	0.09 ± 0.06 e	0.21 ± 0.04 cdef	0.09 ± 0.01 ef	0.04 ± 0.03 b	0.13 ± 0.04 def	0.08 ± 0.06 def	0.17 ± 0.02 ghijklm	0.15 ± 0.01 gh	0.11 ± 0.05 cde	0.03 ± 0.00 bc	0.03 ± 0.02 cde	0.01 ± 0.01 ef	0.00 ± 0.00 b	0.00 ± 0.00 d
DHL-151340	10h	39.25 ± 1.87 ab	22.48 ± 1.05 bcd	0.14 ± 0.11 e	5.37 ± 0.05 cde	4.35 ± 0.59 ef	0.45 ± 0.32 g	0.00 ± 0.00 c	1.1 ± 0.01 efg	0.32 ± 0.26 ghi	0.66 ± 0.21 c	0.08 ± 0.05 g	1.03 ± 0.24 defg	0.79 ± 0.06 abcd	0.55 ± 0.01 fg	1.16 ± 0.26 hijk	0.76 ± 0.12 efghij	0.64 ± 0.04 defg	0.55 ± 0.07 defg	0.2 ± 0.01 fg	0.00 ± 0.00 a	0.4 ± 0.05 ghijk	0.61 ± 0.02 defgh	0.27 ± 0.02 efgh	0.24 ± 0.03 de	0.33 ± 0.00 abc	0.54 ± 0.16 fgh	0.23 ± 0.00 ghijk	0.27 ± 0.06 efg	0.3 ± 0.04 bcd	1.21 ± 0.1 efghi	0.11 ± 0.05 b	0.24 ± 0.00 defg	0.21 ± 0.05 a	0.27 ± 0.01 bcde	0.12 ± 0.1 def	0.2 ± 0.06 cdef	0.02 ± 0.02 b	0.13 ± 0.01 def	0.16 ± 0.06 cdef	0.21 ± 0.01 ghijk	0.12 ± 0.03 gh	0.1 ± 0.02 cde	0.12 ± 0.01 abc	0.00 ± 0.00 e	0.1 ± 0.02 def	0.00 ± 0.00 b	0.01 ± 0.01 d
Hilose®	10h	31.65 ± 1.49 defg	27.54 ± 1.13 ab	0.25 ± 0.02 e	5.41 ± 0.25 bcde	4.62 ± 0.99 ef	1.88 ± 0.46 defg	0.00 ± 0.00 c	1.02 ± 0.14 fg	0.57 ± 0.04 fghi	0.76 ± 0.37 c	0.09 ± 0.01 g	1.41 ± 0.08 de	0.55 ± 0.07 cd	0.63 ± 0.08 efg	1.42 ± 0.19 hijk	1.03 ± 0.00 defg	0.64 ± 0.15 defg	0.59 ± 0.1 defg	0.49 ± 0.03 defg	0.00 ± 0.00 a	0.37 ± 0.01 ghijkl	0.73 ± 0.09 cdefgh	0.09 ± 0.09 h	0.32 ± 0.02 de	0.19 ± 0.14 abc	0.95 ± 0.05 defgh	0.36 ± 0.04 defghi	0.58 ± 0.1 cdefg	0.46 ± 0.13 abcd	1.23 ± 0.23 efghi	0.23 ± 0.05 ab	0.3 ± 0.02 cdef	0.1 ± 0.14 a	0.09 ± 0.09 e	0.17 ± 0.12 cdef	0.25 ± 0.11 cdef	0.03 ± 0.03 b	0.12 ± 0.03 def	0.14 ± 0.02 def	0.18 ± 0.02 ghijkl	0.15 ± 0.01 gh	0.11 ± 0.03 cde	0.22 ± 0.03 abc	0.06 ± 0.02 bcde	0.08 ± 0.06 ef	0.00 ± 0.00 b	0.02 ± 0.01 d
SBExpCE	10h	36.89 ± 1.75 abcd	21.05 ± 3.09 cde	0.08 ± 0.06 e	5.19 ± 2.17 cde	3.78 ± 0.86 ef	0.87 ± 0.6 fg	0.00 ± 0.00 c	1.04 ± 0.15 efg	0.76 ± 0.04 fghi	0.51 ± 0.3 c	0.03 ± 0.03 g	1.27 ± 0.41 def	0.62 ± 0.06 cd	0.57 ± 0.16 fg	1.3 ± 0.11 hijk	0.6 ± 0.43 fghij	0.72 ± 0.07 de	0.65 ± 0.06 defg	0.31 ± 0.02 fg	0.00 ± 0.00 a	0.55 ± 0.03 fghi	0.45 ± 0.38 defgh	0.21 ± 0.15 fgh	0.08 ± 0.06 de	0.31 ± 0.02 abc	0.46 ± 0.12 fgh	0.34 ± 0.04 defghi	0.47 ± 0.1 defg	0.41 ± 0.05 abcd	1.02 ± 0.23 ghijk	0.18 ± 0.08 b	0.35 ± 0.05 bcde	0.12 ± 0.17 a	0.14 ± 0.05 de	0.18 ± 0.13 cdef	0.13 ± 0.13 def	0.01 ± 0.02 b	0.15 ± 0.03 def	0.08 ± 0.05 def	0.22 ± 0.01 ghij	0.12 ± 0.09 gh	0.08 ± 0.06 cde	0.16 ± 0.04 abc	0.00 ± 0.00 e	0.12 ± 0.08 cdef	0.00 ± 0.00 b	0.00 ± 0.00 d
Control	24h	42.17 ± 0.00 a	1.44 ± 0.00 g	3.25 ± 0.00 e	3.68 ± 0.00 cdefg	3.51 ± 0.00 ef	0.09 ± 0.00 g	2.61 ± 0.00 c	0.83 ± 0.00 fg	0.54 ± 0.00 fghi	3.25 ± 0.00 bc	0.48 ± 0.00 ef	0.87 ± 0.00 efg	1.05 ± 0.00 abc	0.44 ± 0.00 fg	0.76 ± 0.00 hijk	1.76 ± 0.00 abcd	0.3 ± 0.00 hijk	1.5 ± 0.00 abcd	0.19 ± 0.00 fg	0.00 ± 0.00 a	0.2 ± 0.00 jklm	0.33 ± 0.00 efgh	1.03 ± 0.00 a	0.21 ± 0.00 de	0.13 ± 0.00 abc	1.23 ± 0.00 cdefgh	0.23 ± 0.00 ghijk	0.35 ± 0.00 defg	0.54 ± 0.00 abcd	1.28 ± 0.00 efghi	0.62 ± 0.00 ab	0.2 ± 0.00 efgh	0.19 ± 0.00 a	0.08 ± 0.00 e	0.08 ± 0.00 ef	0.25 ± 0.00 cdef	0.06 ± 0.00 b	0.1 ± 0.00 def	0.09 ± 0.00 def	0.06 ± 0.00 jklmno	0.16 ± 0.00 gh	0.21 ± 0.00 bcde	0.35 ± 0.00 abc	0.04 ± 0.00 cde	0.1 ± 0.00 def	0.00 ± 0.00 b	0.13 ± 0.00 c
Annapurna®	24h	26.69 ± 0.34 fg	19.1 ± 0.1 cde	28.18 ± 1.58 a	1.04 ± 0.37 efg	1.93 ± 0.46 f	0.42 ± 0.32 g	4.42 ± 0.47 abc	0.7 ± 0.02 fg	0.19 ± 0.14 hi	2.66 ± 0.6 bc	0.02 ± 0.03 g	0.58 ± 0.24 fg	0.46 ± 0.03 cd	0.02 ± 0.02 g	0.49 ± 0.02 ijk	0.12 ± 0.06 hij	0.12 ± 0.00 jk	0.03 ± 0.04 g	0.26 ± 0.02 fg	0.00 ± 0.00 a	0.15 ± 0.11 klm	0.26 ± 0.01 fgh	0.59 ± 0.1 bcde	0.95 ± 0.04 ab	0.00 ± 0.00 c	0.17 ± 0.07 h	0.08 ± 0.05 ijk	0.14 ± 0.05 g	0.21 ± 0.09 bcd	0.4 ± 0.1 ijkl	0.38 ± 0.14 ab	0.00 ± 0.00 i	0.09 ± 0.06 a	0.00 ± 0.00 e	0.06 ± 0.05 ef	0.05 ± 0.03 f	0.00 ± 0.01 b	0.12 ± 0.02 def	0.00 ± 0.00 f	0.04 ± 0.03 lmno	0.05 ± 0.02 gh	0.02 ± 0.02 e	0.01 ± 0.01 bc	0.02 ± 0.00 cde	0.01 ± 0.01 f	0.00 ± 0.00 b	0.00 ± 0.00 d
DHL-151340	24h	31.77 ± 1.25 cdef	17.44 ± 0.33 de	24.18 ± 0.9 b	2.65 ± 0.21 defg	3.19 ± 1.48 f	0.82 ± 0.1 g	2.72 ± 0.38 c	0.49 ± 0.25 g	0.45 ± 0.08 ghi	1.54 ± 1.77 c	0.05 ± 0.04 g	0.49 ± 0.15 fg	0.66 ± 0.1 bcd	0.05 ± 0.04 g	0.34 ± 0.17 jk	0.13 ± 0.04 hij	0.13 ± 0.03 jk	0.06 ± 0.08 g	0.13 ± 0.01 g	0.00 ± 0.00 a	0.11 ± 0.08 lm	0.12 ± 0.11 h	0.44 ± 0.21 bcdefgh	0.67 ± 0.05 abcd	0.02 ± 0.01 bc	0.13 ± 0.07 h	0.05 ± 0.04 ijk	0.19 ± 0.01 efg	0.21 ± 0.05 bcd	0.48 ± 0.06 hijkl	0.2 ± 0.07 ab	0.04 ± 0.03 hi	0.07 ± 0.1 a	0.01 ± 0.01 e	0.08 ± 0.01 ef	0.04 ± 0.00 f	0.02 ± 0.02 b	0.06 ± 0.05 ef	0.00 ± 0.00 f	0.06 ± 0.00 klmno	0.08 ± 0.02 gh	0.01 ± 0.01 e	0.06 ± 0.03 bc	0.00 ± 0.00 e	0.02 ± 0.02 ef	0.00 ± 0.00 b	0.00 ± 0.00 d
Hilose®	24h	26.08 ± 0.65 g	17.21 ± 0.64 de	22.34 ± 2.17 bc	2 ± 0.11 defg	2.8 ± 0.79 f	0.7 ± 0.53 g	0.62 ± 0.53 c	0.39 ± 0.22 g	0.32 ± 0.03 ghi	12.58 ± 1.68 a	0.07 ± 0.01 g	0.72 ± 0.09 efg	0.3 ± 0.21 d	0.04 ± 0.03 g	0.28 ± 0.11 jk	0.09 ± 0.12 ij	0.08 ± 0.06 k	0.15 ± 0.05 g	0.11 ± 0.08 g	0.00 ± 0.00 a	0.19 ± 0.02 klm	0.24 ± 0.00 fgh	0.46 ± 0.11 bcdefg	0.36 ± 0.26 bcde	0.01 ± 0.01 c	0.32 ± 0.03 fgh	0.08 ± 0.02 ijk	0.15 ± 0.03 g	0.23 ± 0.1 bcd	0.21 ± 0.08 jkl	0.77 ± 0.34 ab	0.02 ± 0.02 i	0.1 ± 0.02 a	0.01 ± 0.01 e	0.08 ± 0.00 ef	0.06 ± 0.04 ef	0.00 ± 0.00 b	0.2 ± 0.04 cdef	0.00 ± 0.00 f	0.03 ± 0.02 mno	0.03 ± 0.01 gh	0.04 ± 0.01 de	0.00 ± 0.00 c	0.00 ± 0.00 e	0.00 ± 0.00 f	0.00 ± 0.00 b	0.00 ± 0.00 d
SBExpCE	24h	33.96 ± 0.22 bcde	18.38 ± 1.07 cde	21.46 ± 0.92 bc	2.25 ± 0.65 defg	2.45 ± 1.11 f	0.8 ± 0.22 g	0.00 ± 0.00 c	0.79 ± 0.09 fg	0.5 ± 0.06 fghi	1.19 ± 0.22 c	0.00 ± 0.00 g	0.59 ± 0.06 fg	0.43 ± 0.04 cd	0.09 ± 0.00 g	0.22 ± 0.17 k	0.11 ± 0.09 hij	0.05 ± 0.04 k	0.15 ± 0.00 fg	0.24 ± 0.01 fg	0.00 ± 0.00 a	0.21 ± 0.01 jklm	0.35 ± 0.02 efgh	0.2 ± 0.00 fgh	0.15 ± 0.12 de	0.00 ± 0.00 c	0.26 ± 0.18 gh	0.06 ± 0.02 ijk	0.17 ± 0.01 fg	0.17 ± 0.02 bcd	0.3 ± 0.02 ijkl	0.44 ± 0.01 ab	0.07 ± 0.01 hi	0.08 ± 0.07 a	0.01 ± 0.00 e	0.00 ± 0.00 f	0.02 ± 0.02 f	0.00 ± 0.00 b	0.03 ± 0.03 ef	0.00 ± 0.00 f	0.1 ± 0.01 ijklmno	0.08 ± 0.01 gh	0.07 ± 0.02 cde	0.05 ± 0.00 bc	0.01 ± 0.00 de	0.03 ± 0.02 ef	0.00 ± 0.00 b	0.00 ± 0.00 d
Control	48h	41.84 ± 0.00 a	0.84 ± 0.00 g	4.86 ± 0.00 e	1.3 ± 0.00 efg	2.68 ± 0.00 f	1.89 ± 0.00 defg	11.74 ± 0.00 a	0.6 ± 0.00 fg	0.22 ± 0.00 ghi	4 ± 0.00 bc	0.27 ± 0.00 efg	0.36 ± 0.00 g	0.49 ± 0.00 cd	0.11 ± 0.00 g	0.68 ± 0.00 hijk	1.4 ± 0.00 bcdef	0.25 ± 0.00 ijk	0.16 ± 0.00 efg	0.27 ± 0.00 fg	0.00 ± 0.00 a	0.16 ± 0.00 klm	0.2 ± 0.00 fgh	0.67 ± 0.00 abcde	0.12 ± 0.00 de	0.04 ± 0.00 bc	2.27 ± 0.00 abc	0.13 ± 0.00 hijk	0.75 ± 0.00 bcdefg	1.06 ± 0.00 a	0.58 ± 0.00 ghijkl	0.28 ± 0.00 ab	0.06 ± 0.00 hi	0.09 ± 0.00 a	0.03 ± 0.00 e	0.00 ± 0.00 f	0.00 ± 0.00 f	0.00 ± 0.00 b	0.32 ± 0.00 abcde	0.02 ± 0.00 ef	0.04 ± 0.00 klmno	0.04 ± 0.00 gh	0.21 ± 0.00 bcde	0.14 ± 0.00 abc	0.64 ± 0.00 a	0.00 ± 0.00 f	0.54 ± 0.00 a	0.18 ± 0.00 b
Annapurna®	48h	26.78 ± 3.19 fg	19.99 ± 4.16 cde	19.23 ± 0.76 c	0.99 ± 0.22 efg	3.25 ± 1.5 f	1.39 ± 0.75 defg	10.31 ± 7.31 ab	0.24 ± 0.14 g	0.21 ± 0.04 hi	0.61 ± 0.28 c	0.02 ± 0.02 g	0.9 ± 0.21 efg	0.56 ± 0.09 cd	0.01 ± 0.01 g	0.24 ± 0.07 jk	1.16 ± 0.16 cdef	0.00 ± 0.00 k	0.55 ± 0.28 defg	0.1 ± 0.14 g	0.00 ± 0.00 a	0.07 ± 0.03 m	0.12 ± 0.00 h	0.46 ± 0.08 bcdefg	1.26 ± 0.13 a	0.00 ± 0.00 c	0.32 ± 0.26 fgh	0.01 ± 0.02 jk	0.04 ± 0.03 g	0.3 ± 0.23 bcd	0.13 ± 0.04 l	0.6 ± 0.39 ab	0.00 ± 0.00 i	0.02 ± 0.03 a	0.00 ± 0.00 e	0.00 ± 0.00 f	0.04 ± 0.03 f	0.22 ± 0.27 ab	0.22 ± 0.09 bcdef	0.00 ± 0.00 f	0.02 ± 0.01 no	0.02 ± 0.01 h	0.00 ± 0.00 e	0.01 ± 0.01 bc	0.00 ± 0.00 e	0.00 ± 0.00 f	0.03 ± 0.05 b	0.00 ± 0.00 d
DHL-151340	48h	32.98 ± 1.82 cde	19.41 ± 1.61 cde	19.27 ± 2.19 c	0.78 ± 0.33 fg	4.69 ± 2.7 ef	1.45 ± 0.62 defg	3.67 ± 2.62 bc	0.45 ± 0.05 g	0.39 ± 0.02 ghi	2.39 ± 1.49 bc	0.01 ± 0.00 g	0.43 ± 0.03 g	0.64 ± 0.04 bcd	0.01 ± 0.01 g	0.13 ± 0.09 k	0.28 ± 0.29 ghij	0.00 ± 0.00 k	0.1 ± 0.14 g	0.15 ± 0.04 fg	0.00 ± 0.00 a	0.04 ± 0.03 m	0.14 ± 0.04 gh	0.62 ± 0.13 abcde	1.24 ± 0.37 a	0.00 ± 0.00 c	0.09 ± 0.08 h	0.00 ± 0.00 jk	0.05 ± 0.04 g	0.09 ± 0.09 cd	0.15 ± 0.04 l	0.87 ± 0.41 ab	0.00 ± 0.00 i	0.04 ± 0.04 a	0.00 ± 0.00 e	0.00 ± 0.00 f	0.00 ± 0.00 f	0.74 ± 0.54 a	0.27 ± 0.09 abcde	0.00 ± 0.00 f	0.04 ± 0.03 mno	0.00 ± 0.01 h	0.00 ± 0.00 e	0.01 ± 0.01 bc	0.00 ± 0.00 e	0.00 ± 0.00 f	0.01 ± 0.01 b	0.01 ± 0.01 d
Hilose®	48h	30.51 ± 0.75 efg	19.43 ± 1.51 cde	15.05 ± 2.2 d	1.3 ± 0.28 efg	4.05 ± 0.47 ef	1.57 ± 0.51 defg	10.29 ± 0.91 ab	0.29 ± 0.03 g	0.24 ± 0.02 ghi	0.65 ± 0.47 c	0.02 ± 0.02 g	1.38 ± 0.2 de	0.52 ± 0.09 cd	0.01 ± 0.01 g	0.19 ± 0.09 k	0.88 ± 0.11 defghi	0.01 ± 0.01 k	0.44 ± 0.26 defg	0.14 ± 0.1 g	0.00 ± 0.00 a	0.05 ± 0.03 m	0.13 ± 0.01 h	0.38 ± 0.13 cdefgh	0.91 ± 0.03 abc	0.00 ± 0.00 c	0.6 ± 0.07 fgh	0.02 ± 0.01 jk	0.08 ± 0.03 g	0.36 ± 0.08 bcd	0.18 ± 0.05 kl	0.85 ± 0.18 ab	0.01 ± 0.01 i	0.01 ± 0.02 a	0.00 ± 0.00 e	0.00 ± 0.00 f	0.04 ± 0.01 f	0.38 ± 0.25 ab	0.3 ± 0.03 abcde	0.00 ± 0.00 f	0.01 ± 0.01 o	0.02 ± 0.02 gh	0.03 ± 0.01 de	0.00 ± 0.00 c	0.00 ± 0.00 e	0.00 ± 0.00 f	0.00 ± 0.00 b	0.00 ± 0.00 d
SBExpCE	48h	36.77 ± 1.21 abcd	18.74 ± 0.56 cde	22.23 ± 1.01 bc	0.36 ± 0.14 g	2.34 ± 0.21 f	0.42 ± 0.29 g	1.4 ± 1.14 c	0.22 ± 0.18 g	0.48 ± 0.01 fghi	3.93 ± 2.03 bc	0.00 ± 0.00 g	0.47 ± 0.05 fg	0.79 ± 0.06 abcd	0.00 ± 0.00 g	0.00 ± 0.00 k	0.01 ± 0.01 j	0.00 ± 0.00 k	0.15 ± 0.03 fg	0.17 ± 0.05 fg	0.00 ± 0.00 a	0.03 ± 0.02 m	0.12 ± 0.02 h	0.55 ± 0.04 bcdef	0.41 ± 0.33 bcde	0.00 ± 0.00 c	0.03 ± 0.01 h	0.00 ± 0.00 k	0.04 ± 0.03 g	0.03 ± 0.03 d	0.09 ± 0.03 l	0.79 ± 0.11 ab	0.00 ± 0.00 i	0.00 ± 0.00 a	0.00 ± 0.00 e	0.00 ± 0.00 f	0.00 ± 0.00 f	0.25 ± 0.15 ab	0.00 ± 0.00 f	0.00 ± 0.00 f	0.03 ± 0.03 mno	0.00 ± 0.00 h	0.00 ± 0.00 e	0.17 ± 0.14 abc	0.00 ± 0.00 e	0.00 ± 0.00 f	0.00 ± 0.00 b	0.00 ± 0.00 d
Data are expressed as mean relative abundance, and only taxa with a mean relative abundance > 0.5% are shown. Statistical differences were evaluated by two-way ANOVA considering product and fermentation time, including their interaction, followed by Games–Howell post hoc test (p < 0.05). Different letters indicate statistically significant differences among product × time combinations.
